# Supplementary material for: CO 2 flux characteristics of the grassland ecosystem and its response to environmental factors in the dry-hot valley of Jinsha River, China
Source: Copernicus journal article supplement (doi:10.5194/egusphere-2024-1226), 2024-07-01
Supplement: Supplementary file [file egusphere-2024-1226-RC1-supplement.pdf]

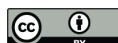

# CO<sub>2</sub> flux characteristics of the grassland ecosystem and its response to environmental factors in the dry-hot valley of Jinsha River, China

Chaolei Yang<sup>a,b,c,d</sup>, Yufeng Tian<sup>a,b,c,d,\*</sup>, Jingqi Cui<sup>e</sup>, Guangxiong He<sup>f</sup>, Jingyuan Li<sup>e</sup>,  
Canfeng Li<sup>a,b,c</sup>, Haichuang Duan<sup>a</sup>, Zong Wei<sup>a,b</sup>, Liu Yan<sup>a,b</sup>, Xin Xia<sup>a,b</sup>, Yong Huang<sup>a,b</sup>,  
Aihua Jiang<sup>a,b</sup>

<sup>a</sup> Kunming General Survey of Natural Resources Center, China Geological Survey, Kunming, 650111, China

<sup>b</sup> Yunnan Province Field Science Observation and Research Station on the Evolution of Soil and Water Resources and the Carbon Sequestration Enhancement Effects in the Alpine Gorge Area of the Jinsha River, Chuxiong, 651400, China

<sup>c</sup> Technology Innovation Center for Natural Carbon Sink, Kunming, 650111, China

<sup>d</sup> Key Laboratory of Coupling Process and Effect of Natural Resources Elements, Beijing, 100055, China

<sup>e</sup> Institute of Space Weather, School of Atmospheric Physics, Nanjing University of Information Science and Technology, Nanjing, 210044, China

<sup>f</sup> Tropical Eco-Agriculture Research Institute, Yunnan Academy of Agricultural Sciences, Chuxiong, 651300, China

Correspondence to: Yufeng Tian (yufeng\_tian818@126.com)

**ABSTRACT:** The dry-hot valley of Jinsha River is distinguished by prolonged drought and high temperatures, making it a distinct non-zonal hot island habitat in the global temperate zone. It is an ideal location for studying changes in plant carbon budget under sustained drought and high-temperature conditions. However, there is currently a dearth of reports on CO<sub>2</sub> flux variations within plant ecosystems in this region. The study quantitatively analyzed the characteristics of CO<sub>2</sub> flux variation in the grassland ecosystem in this region and its response mechanisms to environmental factors using continuous observation data obtained from static assimilative chamber. The results indicate that both the environmental factors and CO<sub>2</sub> flux variations in grassland ecosystems exhibit significant seasonal characteristics. During the dry season (March to May), the grassland acts as a carbon source, exhibiting a daily average CO<sub>2</sub> flux of 0.1632 μmol·m<sup>-2</sup>·s<sup>-1</sup>, which cumulative CO<sub>2</sub> emissions for each month were 18.64 g·m<sup>-2</sup>, 15.96 g·m<sup>-2</sup>, and 20.64 g·m<sup>-2</sup>, respectively. The ecosystem showed noteworthy carbon absorption characteristics during the rainy season (August to October), with a daily average CO<sub>2</sub> flux of -0.1062 μmol·m<sup>-2</sup>·s<sup>-1</sup>, which cumulative CO<sub>2</sub> absorption for each month were 6.42 g·m<sup>-2</sup>, 24.41 g·m<sup>-2</sup>, and 5.14 g·m<sup>-2</sup>, respectively. Throughout the year, the ecosystem was a weak carbon source, emitting an annual cumulative CO<sub>2</sub> of 0.7078 t·ha<sup>-1</sup>·a<sup>-1</sup>, demonstrating carbon-neutral traits. In terms of environmental factors, there was a robust negative correlation exists with CO<sub>2</sub> flux between photosynthetically active radiation during the rainy season ( $R = -0.578$ ,  $P < 0.01$ ). The daily CO<sub>2</sub> flux in different seasons was positively correlated with precipitation and relative humidity ( $P < 0.01$ ), and negatively correlated with air temperature, soil



38 temperature and vapor pressure deficit ( $P < 0.01$ ). The diurnal variation of  $\text{CO}_2$  flux in dry season  
39 was mainly affected by relative humidity, while that in rainy season was mainly affected by relative  
40 humidity and vapor pressure deficit. The variation of  $\text{CO}_2$  flux was most influenced by soil water  
41 content, relative humidity, and vapor pressure deficit at both daily and monthly scales throughout  
42 the year. The influence of temperature factor on  $\text{CO}_2$  flux changes at different time scales is  
43 generally weak.

44

45 **Key words:** dry-hot valley of Jinsha River; savanna; grassland ecosystem;  $\text{CO}_2$  flux; environmental  
46 factors

47

## 48 1 Introduction

49 Since the industrial revolution, human economic and social progress heavily relies on fossil  
50 energy consumption, the excessive release of greenhouse gases has resulted in a rise in atmospheric  
51  $\text{CO}_2$  concentration and climate warming (Sha et al., 2022; Wang et al., 2023), and has also produced  
52 a series of ecological and environmental problems. The terrestrial ecosystem can absorb about  
53 15.0%–30.0% of anthropogenic  $\text{CO}_2$  emissions per year and carbon-neutrality-capacity index reach  
54 27.14% (Green et al., 2019; Bai et al., 2023; Liu et al., 2023; Zeng et al., 2023), which is a significant  
55 carbon sink (Piao et al., 2018; Yang et al., 2022), studying the dynamic shifts in the carbon budget  
56 and carbon-neutrality-capacity within global terrestrial ecosystems, along with their environmental  
57 driving factors, has emerged as a significant topic in the realm of global change (Houghton, 2001;  
58 Bai et al., 2023). Constituting about 40.5% of the global land surface, grasslands serve as a crucial  
59 element of terrestrial ecosystems, and its carbon storage represents around 1/3 of the total terrestrial  
60 carbon storage globally, equivalent to the carbon storage of forest ecosystems (White et al., 2000;  
61 Wang et al., 2021; Bai et al., 2022), in which organic carbon storage is about 525 Pg C ( $1\text{Pg}=10^{15}$   
62 g) (Fang et al., 2007; Bai et al., 2022), significantly influencing the global carbon balance.

63 The savanna ecosystems cover 1/6 of the Earth's total land area (Grace et al., 2006), which  
64 ecosystem structure and vegetation community composition are significantly controlled by  
65 hydrological conditions (Yu et al., 2015; Lee et al., 2018; Jin et al., 2019; Zhang et al., 2019;  
66 Hoffmann, 2023) and are composed of mixed forest and grassland ecosystems. The vegetation is  
67 mainly composed of grass, with sparse distribution of trees and shrubs. Being a significant  
68 component of the worldwide grassland ecosystem, and its net primary productivity (NPP) is about  
69 30.0% of the terrestrial ecosystems (Grace et al., 2006; Peel et al., 2007; Dobson et al., 2022), which  
70 has significant impacts on global material cycling, energy flow, and climate change. Related



71 **researches** have indicated that the herbaceous plants in the savanna ecosystem are mainly C<sub>4</sub> grasses,  
72 but **only have medium productivity**, and their carbon flux changes are **highly** seasonal (Grace et al.,  
73 2006). **The rainy season is mainly dominated by carbon absorption, and the maximum rate of carbon**  
74 **fixation can reach 2/3 of the maximum value of the tropical rainforest.** The dry season is marked by  
75 weak carbon emission or weak carbon sinks (Grace et al., 1995; Malhi., 1998; Saleska et al., 2003;  
76 Bousquet et al., 2006; Millard et al., 2008; Livesley et al., 2011; Fei et al., 2017a). Furthermore, in  
77 the tropical savanna ecosystem, grass-derived **carbon** contributes to over half of the total soil organic  
78 carbon in the soil up to a depth of 1 meter, even in the soil under the tree, that is, the carbon in the  
79 soil mainly comes from herbaceous plants (Zhou et al., 2023). Simultaneously, **ince** the savanna  
80 ecosystem mainly stores carbon in the soil rather than the biomass of trees, **certain** researchers have  
81 suggested that it may emerge as a more significant carbon sink resource than forests in the future  
82 (Dobson et al., 2022).

83       The savanna ecosystem in China is mainly manifested as the ecological landscape of the valley-  
84 type sparsely shrub-grass vegetation distributed in the special geographical unit of the dry-hot valley,  
85 which is similar to the tropical savanna grassland. It is also known as valley-type savanna vegetation  
86 or semi-savanna vegetation (Jin et al., 1987; Shen et al., 2010). It is mainly **distributed occurs** in the  
87 Yuanjiang (YJ), Nu River, and Jinsha River (JS), and their tributaries in southwest China. The  
88 ecosystem is characterized by extremely high annual average temperature and **lack of water source**.  
89 The species richness increases with altitude (He et al., 2024), which belongs to the non-regional  
90 high temperature arid area evolved from the global temperate humid climate zone (Zhang, 1992).  
91 At present, there are limited studies on the carbon balance of the savanna ecosystem in the dry-hot  
92 valley of China. The existing studies primarily concentrate on the YJ. In the investigation of soil  
93 respiration dynamics in the savanna ecosystem of the YJ, Yang et al. (2020) **discovered** that the  
94 annual total carbon emission from soil respiration in this region is relatively low compared to global  
95 savanna ecosystems, at 4.20 t·ha<sup>-1</sup>·a<sup>-1</sup>. Fei et al. (2017a) revealed that the savanna ecosystem of the  
96 YJ was a carbon sink, and about 84.0% of the carbon sinks was mainly concentrated in the rainy  
97 season (1.08 ± 0.35 t C ha<sup>-1</sup>), and the dry season was carbon neutral. **With the backdrop of**  
98 **forthcoming climate change by rising temperatures and diminished rainfall, the ecosystem's carbon**  
99 **sink capacity could potentially decrease.** The dry-hot valley of JS is the largest dry-hot valley in  
100 China, and it is also a typical representative of the valley-type savanna ecosystem in China. However,  
101 **monitor** and research on the CO<sub>2</sub> flux (Fc) features in this region is still lacking.

102       The research focused on the **grassland ecosystem** in the dry-hot valley of JS, utilizing actual  
103 observation data obtained by the static assimilative box method to explore the characteristics and

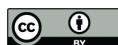

changes of the  $F_c$  in ecosystem, and its correlation with related environmental factors, and calculate the annual  $F_c$  of the ecosystem. In order to offer a scientific reference for in-depth comprehension of the key processes of carbon cycle in the valley-type savanna in China, and to study and predict the ecological function changes of vegetation carbon sequestration under continuous drought and high temperature stress in the future.

## 2 Data and methods

### 2.1 Observation sites

All observational data were derived from the Jinsha River Field Observation Station (26°4'6.24" N, 101°49'41.68" E), whose test site is situated in the Shikanzi Daqing River Basin on the west bank of JS (Fig. 1), with a representative savanna ecological landscape. The elevation of the basin is 1200–1800 m, falling within the realm of the southern subtropical dry-hot monsoon climate, with the characteristics of drought, high temperature and less rain. The ecosystem is extremely fragile and sensitive. The annual average temperature is 22.93°C, with daily maximum temperatures reaching over 43.00°C. The region has distinct rainy season (June to October) and dry season (November to May of the subsequent year), and the annual precipitation is 428.50 mm, with over 90.0% of the precipitation concentrated in the rainy season. The annual evaporation rate is high, typically 3–6 times the annual precipitation (He et al., 2000). Herbaceous plants are mainly *Heteropogon contortus* (Linn.) Beauv., *Eulaliopsis binata* (Retz.) C. E. Hubb, *Cymbopogon goeringii* (Steud.) A. Camus, *Eulalia speciosa* (Debeaux) Kuntze, and so on. The shrubs include *Phyllanthus emblica* L., *Pistacia weinmannifolia* J. Poisson ex Franch, *Quercus franchetii* Skan, *Quercus cocciferoides* Hand. –Mazz, *Dodonaea viscosa* (L.) Jacq., *Albizia kalkora* (Roxb.) Prain, *Osteomeles schwerinae* Schneid., *Osyris wightiana*, and *Terminalia franchetii* Gagnep., etc.

### 2.2 Data source

#### 2.2.1 Micrometeorological Factor Observation

The micro-meteorological factors were continuously monitored in real-time by the DL3000 small automatic meteorological observation system deployed in the test site of the observation station. The observation time began on January 12, 2023, and the observation indexes included air temperature ( $T_a$ ), relative humidity (RH), soil temperature ( $T_s$ ), soil water content (SWC), soil conductivity (SC), precipitation (P), wind speed ( $W_s$ ), wind direction (WD), and photosynthetically active radiation (PAR). The average value of the environmental factors observation data for 5 minutes, 30 minutes, and 24 hour are automatically recorded through the CR1000X data collector. The specific meteorological observation system sensor equipment information is listed in Table 1.

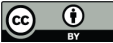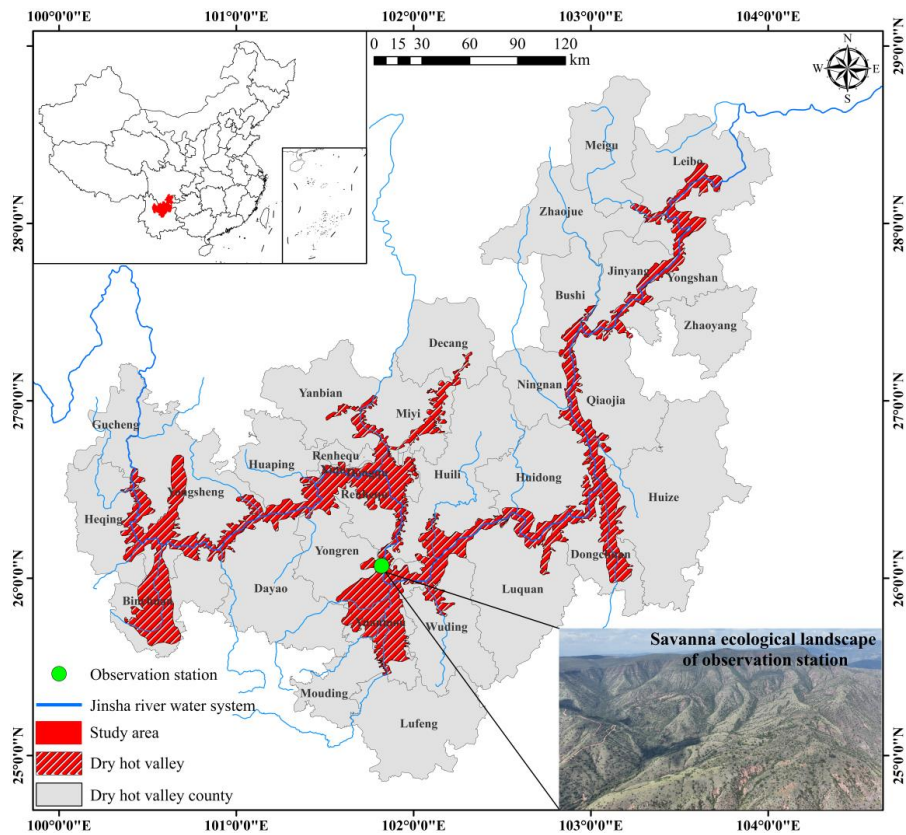

Figure 1 Range of dry-hot valley in JS and location of the Jinsha River Field Observation Station.

Table 1 Information of micrometeorological observation system.

| Name of instrument                  | Observation parameter                                            | Height (depth) of installation (m) |
|-------------------------------------|------------------------------------------------------------------|------------------------------------|
| Temperature and humidity sensor     | Ta (°C) and RH (%)                                               | 1.5                                |
| Photosynthetic effective radiometer | PAR ( $\mu\text{mol} \cdot \text{m}^{-2} \cdot \text{s}^{-1}$ )  | 1.5                                |
| Wind speed and direction sensor     | Ws (m/s) and WD (°)                                              | 1.5                                |
| Rainfall sensor                     | P (mm)                                                           | 1.5                                |
| Soil multi-parameter sensor         | Ts (°C), SWC ( $\text{m}^3 \cdot \text{m}^{-3}$ ), and SC (dS/m) | Soil horizon 0.1                   |

#### 2.2.2 CO<sub>2</sub> flux observation

In order to ensure the representativeness of the observation plots and the spatial integration of the observation data, the typical grassland plots with small micro-habitat differences were selected in the test site of the observation station to lay out and install static assimilative boxes for positioning observation. The observation point is about 10 m away from the automatic meteorological observation system. The observation time begins at 15:05 noon on March 3, 2023, and ends at 10:50

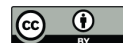

145 a.m. on November 1, 2023. The bottom area of the assimilative box is 0.25 m<sup>2</sup>, and the volume in  
146 the box is 125 L. The whole box is composed of transparent organic glass. There are two sets of  
147 fans in the box, which can fully mix the gas evenly. The height of the base is 8cm, embedded in the  
148 underground soil is 5 cm, and the aboveground part is 3 cm. The NEE is mainly measured by the  
149 CARBOCAP<sup>®</sup> carbon dioxide sensor GMP343 of Visala Company. The diffusion probe of the  
150 sensor can effectively reduce the measurement error caused by the pressure difference of the  
151 pumping system. It has the characteristics of flexibility and high precision and is widely used in  
152 ecosystem CO<sub>2</sub> monitoring. The top cover of the assimilative box can be automatically opened and  
153 closed, and the time of a single complete measurement cycle is 15 minutes. Before the measurement,  
154 the top cover of the assimilative box will be automatically opened, so that the gas in the box and the  
155 surrounding air are mixed evenly, and the time is 5 minutes. Then the top cover of the box is  
156 automatically closed to a closed and stable state, the fan starts, and the gas change in the box is  
157 measured. The measurement and recording time is 10 minutes, so repeated.

#### 158 2.2.3 Other data

159 The boundary data of dry-hot valley was sourced from Deng (2022). The administrative  
160 boundary data (Xu, 2023a; Xu, 2023b) and river data (Xu, 2018) were sourced from the Resources  
161 and Environment Science Data Center (RESDC) from the Chinese Academy of Sciences.

#### 162 2.2.4 Data processing

163 When the carbon flux is measured, the whole monitoring system will collect the original data  
164 of GMP34 at a speed of 2 Hz through the CR1000X data collector, and make an average of 5 seconds  
165 (main scan interval) to participate in the statistics. If the difference between the newly acquired data  
166 and the average value exceeds 8 times the standard deviation, it is classified as an outlier, and such  
167 data points are eliminated. The system performs linear regression fitting on the removed data and  
168 calculates the ecosystem CO<sub>2</sub> exchange capacity, goodness of fit, etc.

169 The ecosystem CO<sub>2</sub> exchange capacity is calculated by the formula (1):

$$170 F_c = \frac{V \times P_{av} \times (1000 - W_{av})}{R \times S \times (T_{av} + 273)} \times \frac{\partial c}{\partial t} (1)$$

171 where  $F_c$  represents CO<sub>2</sub> flux (μmol·m<sup>-2</sup>·s<sup>-1</sup>);  $V$  represents the volume of assimilative chamber (m<sup>3</sup>);  
172  $P_{av}$  represents the mean atmospheric pressure (kPa) inside the chamber during the observation  
173 period;  $W_{av}$  represents the partial pressure of water vapor inside the chamber during the observation  
174 period (mmol·mol<sup>-1</sup>);  $R$  represents the atmospheric constant (8.314 J·mol<sup>-1</sup>·K<sup>-1</sup>);  $S$  represents the  
175 area of assimilative chamber (m<sup>2</sup>);  $\partial c / \partial t$  represents the diffusion rate of CO<sub>2</sub> in the chamber;  $T_{av}$   
176 represents the mean temperature (°C) inside the chamber during the observation period.

177 The linear regression method was employed to fit the CO<sub>2</sub> diffusion rate ( $\partial c / \partial t$ ) (formula 2).



178 This method is the basic method for measuring the CO<sub>2</sub> diffusion rate of most soil respiration and  
179 is widely used (Wen et al., 2007):

$$180 \quad c(t) = c + \frac{\partial c}{\partial t} t \quad (2)$$

181 where  $c(t)$  represents the CO<sub>2</sub> concentration within the assimilative chamber;  $t$  represents the  
182 determination time;  $c$  represents the CO<sub>2</sub> concentration in the assimilative chamber when it is closed.

183 Taking into account the specific conditions of the study area, the recorded  $F_c$  data was  
184 categorized into dry season (March 3rd–May 31st) and rainy season (June 1st–November 1st). Due  
185 to the damage of the assimilative box from June 1st to August 6th and the lack of observation data,  
186 considering the continuity of the data time series and the precision of the data, the dry season carbon  
187 flux data is mainly based on the observation data from March 4th to May 31st, and the rainy season  
188 carbon flux data is mainly based on the observation data from August 7th to October 31st. Quality  
189 control was conducted on the raw data to remove invalid NAN values and abnormal data. Utilizing  
190 the research results from Zhao et al. (2020), missing data points with a time difference of under 3  
191 hours are filled in using linear interpolation. For data with a missing time gap exceeding 3 hours,  
192 differentiate and interpolate the data based on different time intervals. Among them, the data of  
193 daytime in the rainy season were interpolated by formula (3) rectangular hyperbolic model (Ruimy  
194 et al., 1995) to simulate the relationship between NEE and PAR. The missing data of the rainy season  
195 at nighttime and the dry season were interpolated by the multiplicative model (4) of the response of  
196 ecosystem respiration to  $T_s$  and  $SWC$ :

$$197 \quad NEE_{daytime} = R_{daytime} - \frac{A_{max} \times \alpha \times PAR_{daytime}}{A_{max} + \alpha \times PAR_{daytime}} \quad (3)$$

198 where  $NEE_{daytime}$  represents the NEE during the daytime ( $\mu\text{mol} \cdot \text{m}^{-2} \cdot \text{s}^{-1}$ );  $A_{max}$  represents the  
199 maximum photosynthetic rate ( $\mu\text{mol} \cdot \text{m}^{-2} \cdot \text{s}^{-1}$ );  $\alpha$  represents the apparent quantum efficiency  
200 ( $\mu\text{mol} \cdot \text{mol}^{-1}$ );  $R_{daytime}$  represents the daytime ecosystem respiration rate ( $\mu\text{mol} \cdot \text{m}^{-2} \cdot \text{s}^{-1}$ );  $PAR_{daytime}$   
201 represents the PAR during the daytime ( $\mu\text{mol} \cdot \text{m}^{-2} \cdot \text{s}^{-1}$ ).

$$202 \quad ER = \alpha \times e^{\beta T_s} \times SWC^c \quad (4)$$

203 where  $ER$  represents the ecosystem respiration rate ( $\mu\text{mol} \cdot \text{m}^{-2} \cdot \text{s}^{-1}$ );  $\alpha$ ,  $\beta$  and  $c$  represents the fitting  
204 parameters;  $T_s$  and  $SWC$  are shown in Table 1.

205 The vapor pressure deficit (VPD) is calculated by formula (5) (Campbell et al., 2012):

$$206 \quad VPD = 0.61078 e^{\frac{17.27 T_a}{T_a + 237.3}} (1 - RH) \quad (5)$$

207 where  $RH$  and  $T_a$  are shown in Table 1.





## 208 3 Analysis of the effect

### 209 3.1 Dynamic changes in environmental factors

210 Utilizing the observational data of micrometeorological factors, the dynamic attributes of  
211 environmental factors such as Ta, VPD, RH, P, Ws, PAR, Ts and SWC. It can be seen that these  
212 environmental factors showed a high degree of seasonal characteristics, especially the P and SWC  
213 were the most obvious. Among them, the P in the rainy season was 400.80 mm, and mainly  
214 concentrated in August (142 mm), the precipitation frequency was 17 times, and the SWC changes  
215 between 0–0.19 m<sup>3</sup>·m<sup>-3</sup>, also showing a strong response relationship with P (Fig. 2a and 2b). The  
216 minimum RH was 20.65% and the maximum was 94.10%, showing a strong response relationship  
217 with P. The VPD fluctuates between 0.11–4.13 kPa, and its value decreases significantly after May,  
218 which was related to the increase of P and RH in the rainy season (Fig. 2a and 2c). During the  
219 observation period, the PAR varied from 52.28–860.59 μmol·m<sup>-2</sup>·s<sup>-1</sup>, influenced by weather  
220 conditions and displaying significant fluctuations (Fig. 2d). From different seasons, the daily  
221 average of PAR in the dry season (476.50 μmol·m<sup>-2</sup>·s<sup>-1</sup>) exceeded that of the rainy season (432.79  
222 μmol·m<sup>-2</sup>·s<sup>-1</sup>). During the dry season, the mean Ta was 23.04°C, while in the rainy season, it  
223 averaged 25.38°C. The difference was small. Secondly, the highest and lowest values of Ta appear  
224 in May of the dry season. The range of Ta and Ts was 8–34.52°C and 11.58–36.97°C, respectively.  
225 The seasonal variation characteristics of the two were similar, but the Ts was significantly higher  
226 than the Ta, and the change time lags behind the Ta (Fig. 2e). In terms of changes in Ws  
227 characteristics, the highest value of Ws appeared in March, reaching 2.93 m·s<sup>-1</sup>, and the lowest value  
228 appeared in June, which was 0.57 m·s<sup>-1</sup>. The daily average Ws was the highest in February, which  
229 was 1.90 m·s<sup>-1</sup>, and the lowest in August, which was 0.99 m·s<sup>-1</sup>. The Ws decreased significantly  
230 after mid-July (Fig. 2f).

### 231 3.2 Diurnal variation of CO<sub>2</sub> flux

232 The Fc was positive, showing a carbon emission state, throughout the entire diurnal variation  
233 process in the dry season. The diurnal variation showed a ‘W’-type bimodal curve (Fig. 3a) of  
234 decreasing → increasing → decreasing → increasing, that is, the Fc was lower in the morning and  
235 afternoon, and the Fc was higher in the nighttime and noon, especially in April and May when this  
236 diurnal variation pattern was most pronounced. The lowest Fc values appeared in the morning  
237 (8:00–10:00) of each month, which were 0.1178 μmol·m<sup>-2</sup>·s<sup>-1</sup>, 0.1148 μmol·m<sup>-2</sup>·s<sup>-1</sup>, and 0.1397  
238 μmol·m<sup>-2</sup>·s<sup>-1</sup>, respectively. The highest Fc value appeared in the evening (19:20) in March, which  
239 was 0.2158 μmol·m<sup>-2</sup>·s<sup>-1</sup>. In April and May, it appeared at noon (13:35). They were 0.1148 μmol·m



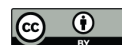

240  $2 \cdot s^{-1}$  and  $0.1397 \mu mol \cdot m^{-2} \cdot s^{-1}$ , respectively.

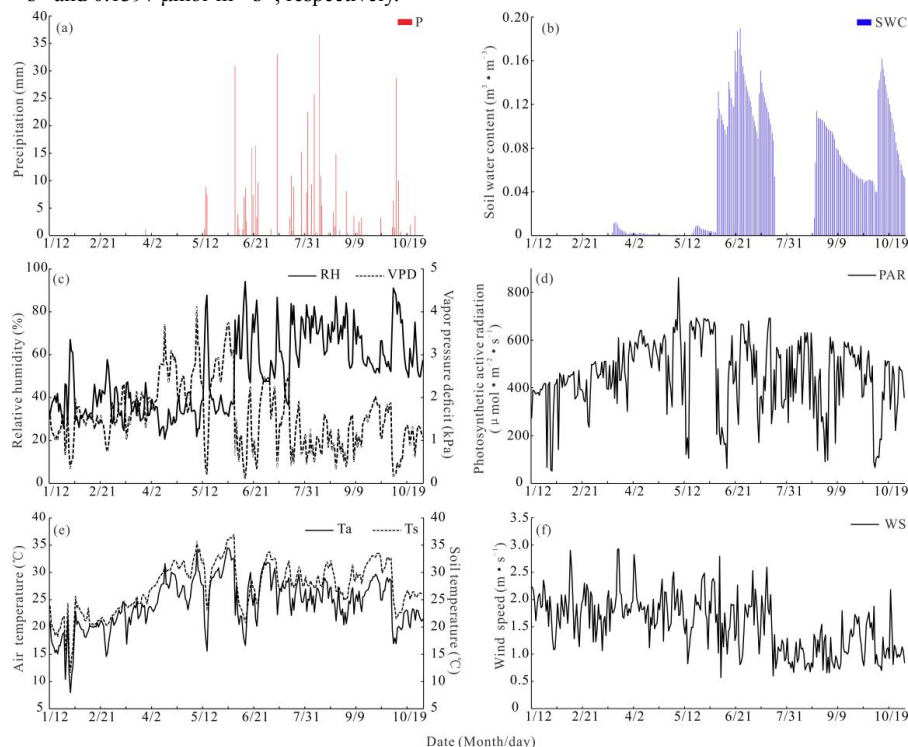

Figure 2 The variation characteristics of environmental factors in the study area.

The diurnal variation of the  $F_c$  was characterized by a 'U'-shaped single-peak curve, which was stable at night and decreased first and then increased during the day (Fig. 3b), during the rainy season. At about 7:35 in the morning, with the increase of PAR intensity, the photosynthesis of the grassland ecosystem is continuously enhanced, and the  $F_c$  begins to become negative. At this time, the grassland ecosystem changes from carbon emission at night to carbon absorption, forming the source of  $CO_2$  absorption and reaching the maximum peak of carbon absorption at 10:00–14:00. Until about 17:20, the  $F_c$  becomes positive again. The grassland ecosystem transitions into a state of carbon emission, releasing  $CO_2$  into the atmosphere. The lowest  $F_c$  values appeared in the morning (10:00–12:00) from the diurnal variation of flux in various months, which were  $-1.4286 \mu mol \cdot m^{-2} \cdot s^{-1}$ ,  $-1.3834 \mu mol \cdot m^{-2} \cdot s^{-1}$ , and  $-1.0278 \mu mol \cdot m^{-2} \cdot s^{-1}$ , respectively. The highest  $F_c$  values appeared in the evening (18:35–18:50), which were  $0.7584 \mu mol \cdot m^{-2} \cdot s^{-1}$ ,  $0.4959 \mu mol \cdot m^{-2} \cdot s^{-1}$  and  $0.5715 \mu mol \cdot m^{-2} \cdot s^{-1}$ , respectively.

### 3.3 Seasonal variation of $CO_2$ flux

From Fig.4, we can find that the seasonal variation of the  $F_c$  in the grassland ecosystem was evident. In the dry season, the ecosystem experiences severe drought and water scarcity, leading to

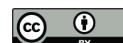

258 poor growth of herbaceous plants, which is characterized by carbon emissions. The monthly  
259 cumulative CO<sub>2</sub> emission fluxes were 18.64 g·m<sup>-2</sup>, 15.96 g·m<sup>-2</sup>, and 20.64 g·m<sup>-2</sup>, respectively,  
260 displaying an initial decline followed by a rise. The CO<sub>2</sub> emission flux was the highest in May. The  
261 ecosystem has abundant P in the rainy season, the SWC is high, the herbaceous plants are in the  
262 growing season, and the photosynthesis capacity is significant, so it is characterized by carbon sink  
263 function. The monthly cumulative CO<sub>2</sub> absorption fluxes were 6.42 g·m<sup>-2</sup>, 24.41 g·m<sup>-2</sup>, and 5.14  
264 g·m<sup>-2</sup>, respectively, displaying a rise initially followed by a decline, and the carbon absorption  
265 capacity in September was the most significant.

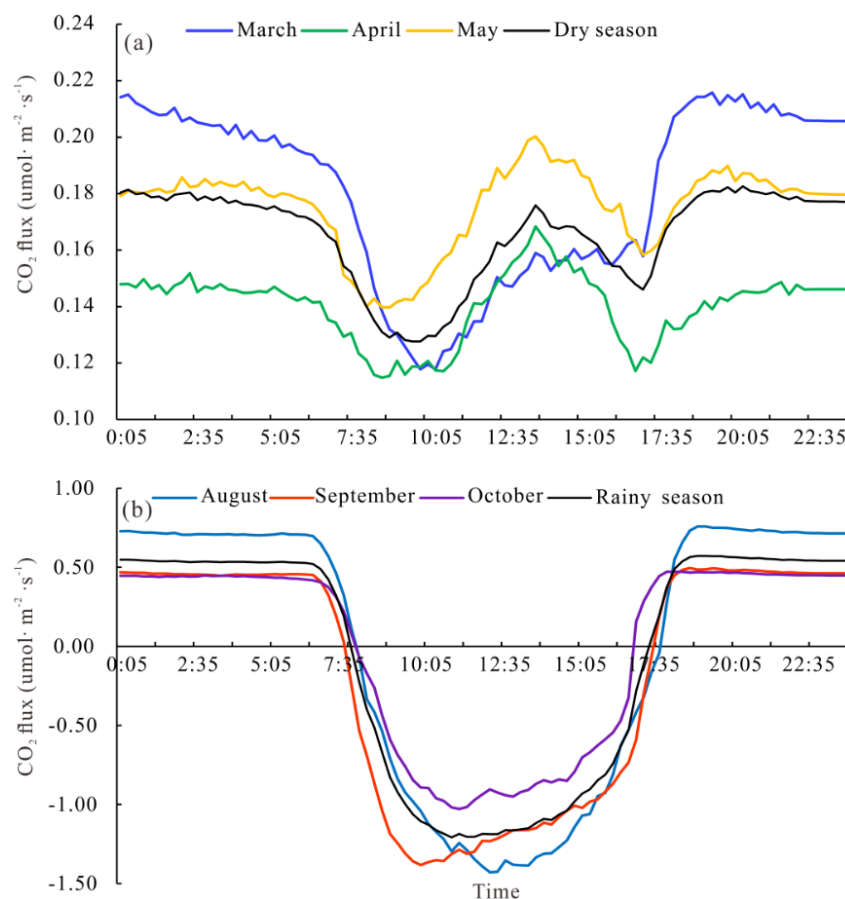

Figure 3 Diurnal variation characteristics of the Fc (a-dry season; b-rainy season).

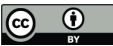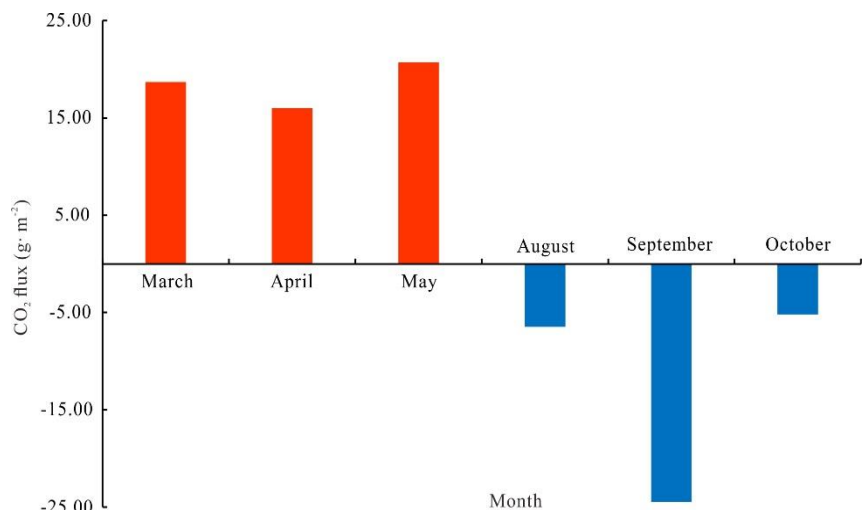

Figure 4 Monthly variation characteristics of the Fc.

The existing observation data were averaged and calculated respectively in this study, and they were used as the daily mean Fc of the two seasons in the whole year. According to the days of the dry season (213 days) and the rainy season (152 days) in the whole year, the dry season, rainy season, and annual Fc of the grassland ecosystem were calculated. The findings indicated that the mean daily Fc was  $0.1632 \mu\text{mol}\cdot\text{m}^{-2}\cdot\text{s}^{-1}$ , and the cumulative CO<sub>2</sub> emission was  $1.3215 \text{ t}\cdot\text{ha}^{-1}$  in the dry season. The daily average Fc was  $-0.1062 \mu\text{mol}\cdot\text{m}^{-2}\cdot\text{s}^{-1}$ , and the cumulative CO<sub>2</sub> uptake was  $0.6137 \text{ t}\cdot\text{ha}^{-1}$  in the rainy season. From the annual scale, the cumulative Fc of the grassland ecosystem was  $0.7078 \text{ t}\cdot\text{ha}^{-1}\cdot\text{a}^{-1}$  ( $0.1926 \text{ t C}\cdot\text{ha}^{-1}\cdot\text{a}^{-1}$ ), making it a weak carbon source.

### 3.4 The relationship between CO<sub>2</sub> flux and environmental factors

#### 3.4.1 Response of CO<sub>2</sub> flux to PAR

This study selected carbon flux data and micrometeorological observation data corresponding to period and analyzed the mutual correlation between Fc and environmental factors. The research area belongs to a typical semi-arid region, where vegetation growth and physiological processes are mainly regulated by temperature and moisture factors (Jiang et al., 2007; Fei et al., 2017a). Therefore, when analyzing the influencing factors of ecosystem CO<sub>2</sub> flux, we mainly selected environmental factors including P, SWC, Ts, Ta, RH, PAR, and VPD for pearson analysis. No significant correlation between PAR and Fc during the dry season was indicated by the results of the pearson correlation analysis ( $R = 0.180$ ,  $P = 0.092$ ). Still, there was a strong negative correlation between PAR and Fc during the rainy season ( $R = -0.578$ ,  $P < 0.01$ ), and this relationship was more obvious in Fig. 5a. As a key environmental factor driving plant photosynthesis, photosynthetically active radiation will directly affect the carbon absorption rate of grassland ecosystem and further

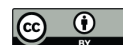

291 affect the carbon budget pattern of ecosystem. In the rainy season, the  $F_c$  of the grassland ecosystem  
 292 decreased with the increase of PAR, and the carbon absorption capacity increased continuously, and  
 293 the relationship between them could be expressed by formula (3). Secondly, when PAR was under  
 294  $500 \mu\text{mol} \cdot \text{m}^{-2} \cdot \text{s}^{-1}$  (Fig. 5b), the NEE of the ecosystem decreases rapidly with increasing PAR. At the  
 295 same time, the distribution of NEE with PAR was relatively concentrated. However, when PAR was  
 296 above  $500 \mu\text{mol} \cdot \text{m}^{-2} \cdot \text{s}^{-1}$ , the magnitude of the decrease in NEE with increasing PAR gradually  
 297 decreases, and the distribution of NEE with PAR was relatively scattered, indicating that the  $F_c$  was  
 298 also influenced by various other environmental factors present in the ecosystem when solar radiation  
 299 is high. Once PAR reaches the light saturation point at  $1523.64 \mu\text{mol} \cdot \text{m}^{-2} \cdot \text{s}^{-1}$ , the NEE of the  
 300 ecosystem reached to its minimum, and the light response curve gradually begins to flatten. These  
 301 research findings align with those of previous studies carried out in diverse grassland ecosystems  
 302 (Zhao et al., 2007; Wang et al., 2015; Guo et al., 2022).

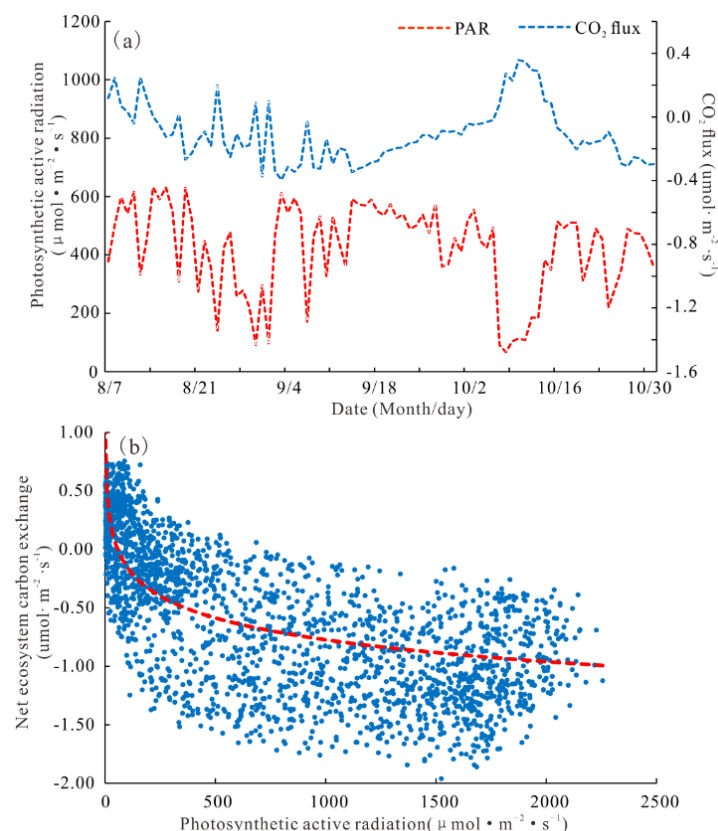

303  
 304 Figure 5 The correlation between PAR and  $F_c$  (a—the relationship between PAR and  $F_c$  in the rainy season; b—the  
 305 response of  $F_c$  to PAR during daytime in the rainy season).



### 3.4.2 Relationship with other environmental factors

With no significant correlation with SWC (Fig. 6a and 6b) shown by the daily scale Fc of grassland ecosystems in the various seasons, there was a moderate negative correlation with Ta and Ts ( $P<0.01$ ), a moderate positive correlation with P ( $P<0.01$ ), and a strong positive correlation with RH ( $P<0.01$ ). The daily scale Fc in the dry season has a moderate negative correlation with VPD ( $P<0.01$ ), while the Fc in the rainy season shows a strong negative correlation with VPD ( $P<0.01$ ). Throughout varying seasons, the Fc increases with the increase of P and RH, as well as the decrease of Ta, Ts, and VPD. Due to the small variations in SWC within the two seasons (Fig. 2b), therefore, the impact of SWC on the diurnal fluctuation of the Fc was not significant. In general, the diurnal variation of Fc in the dry season is mainly affected by RH, while the rainy season is mainly affected by RH and VPD, and the influence of other environmental factors is generally weak.

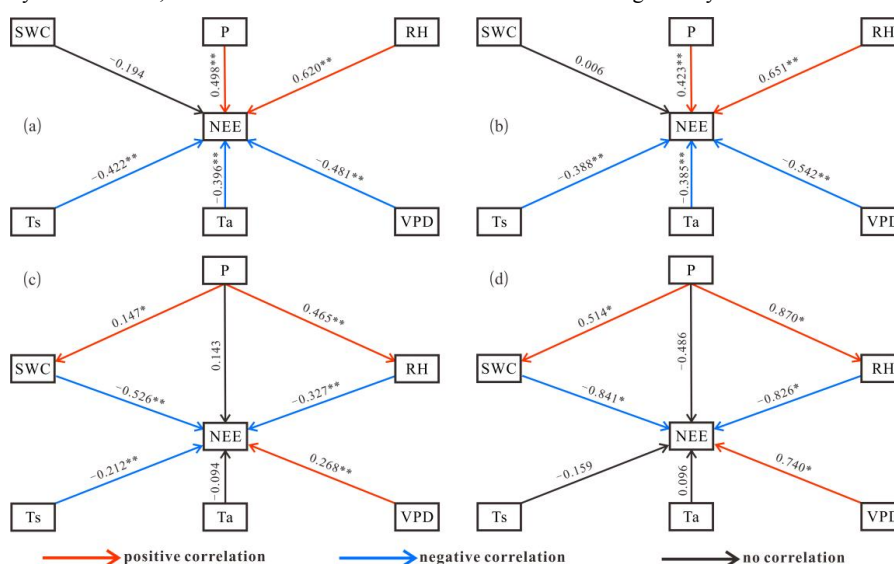

Figure 6 The Pearson correlation between Fc and environmental factors (a–daily scales of the dry season; b–daily scales of the rainy season; c–annual daily scales; d–monthly scales, the \*\* is  $P<0.01$ ; the \* is  $P<0.05$ ).

Throughout the year on a daily scale (Fig. 6c), the Fc showed no significant correlation with Ta and P, a weak positive correlation with VPD ( $P<0.01$ ), a weak negative correlation with Ts ( $P<0.01$ ), a moderate negative correlation with RH ( $P<0.01$ ), and a strong negative correlation with SWC ( $P<0.01$ ). It is evident that as the time series extends, the physiological responses of photosynthesis and respiration processes in the grassland ecosystem to specific environmental factors have undergone changes. As the VPD decreases, and RH, SWC, and Ts increase, and the Fc of ecosystem decreased gradually. Particularly, the impact of SWC was most significant, closely related to the distinct climatic characteristics of wet and dry seasons in the study area. Under such



328 climatic conditions, the variation in SWC throughout the year becomes the dominant factor  
329 restricting regional vegetation growth and recovery (Jiang et al., 2007), significantly influencing the  
330 intra-annual variation of the  $F_c$ .

331 The study also found that at the monthly scale, the  $F_c$  showed no significant correlation with  
332  $T_a$ ,  $T_s$ , and  $P$  (Fig. 6d), but exhibits a strong negative correlation with SWC and RH ( $P < 0.05$ ), and  
333 a strong positive correlation with VPD ( $P < 0.05$ ). As the temporal scale increases, the environmental  
334 driving factors influencing the variation in  $F_c$  decrease, but the correlation significantly increases.  
335 This may be attributed to the short monthly time series of the observational data. In general, at the  
336 monthly scale, SWC, RH, and VPD emerge as the predominant factors influencing the variation in  
337  $F_c$  within the ecosystem. Furthermore, the change in time scale will also affect the correlation  
338 between  $F_c$  and driving factors, aligning with the findings in Heihe River Basin (Bai et al., 2022).

## 339 4 Discussion

### 340 4.1 Carbon flux of grassland ecosystem

341 The herbs in the study area are mainly  $C_4$  plants (Grace et al., 1995), which are called high-  
342 efficiency photosynthetic plants, and the  $C_4$  plants exhibit higher efficiency in photosynthesis and  
343 resource utilization when compared to  $C_3$  plants (Cui et al., 2021; Arslan et al., 2023; Xu et al.,  
344 2023). However, similar to other savanna ecosystems, the study area has been in a dry, high-  
345 temperature, and low-rainy climate for a long time. This extreme climatic condition makes the  
346 productivity of  $C_4$  herbaceous plants only maintain at a medium level (Grace et al., 1995), therefore,  
347 the carbon sink capacity is relatively weak. The data analysis revealed that within the grassland  
348 ecosystem situated in the study area, the daily maximum  $CO_2$  uptake rate was recorded at only  
349  $1.4286 \mu\text{mol} \cdot \text{m}^{-2} \cdot \text{s}^{-1}$ , which stands notably lower in comparison to other grasslands found in arid  
350 and semi-arid regions (Fig. 7) (Li et al., 2005; Kato et al., 2006; Du et al., 2012; Hu et al., 2018;  
351 Niu et al., 2018; Zhang et al., 2020; Guo et al., 2022).

352 Through comparative analysis, it can be observed that various grasslands in arid/semi-arid  
353 regions primarily function as carbon sinks, but some grasslands also show the characteristics of  
354 carbon emissions (Table 2). Simultaneously, most savanna ecosystems globally demonstrate carbon  
355 sequestration features (Table 2), with only a few exhibiting characteristics of carbon emissions, with  
356 the NEE varying from around  $1.28$  to  $-3.87 \text{ t C} \cdot \text{ha}^{-1} \cdot \text{a}^{-1}$ . Consistent with findings from other savanna  
357 ecosystems (Grace et al., 1995; Miranda et al., 1997; Fei et al., 2017a), the special hydrothermal  
358 conditions make the vegetation growth of the grassland in the study area exhibiting pronounced  
359 seasonal characteristics and affect the change of carbon flux. In the season of drought and water



360 shortage, the herbs growth is poor, and the ecosystem mainly emits carbon, showing a carbon source  
361 characteristic. During the rainy season, the vegetation enters the peak period of growth, with strong  
362 carbon fixation ability, and the ecosystem mainly absorbs carbon, showing a carbon sink function.  
363 Overall, the grassland ecosystems in the study area predominantly exhibit carbon emissions, albeit  
364 at relatively low levels, demonstrating a carbon-neutral attribute. The carbon flux characteristics are  
365 the same as those of Sumbrugu Aguusi savanna grassland in Sudan (Quansah et al., 2015), Kruger  
366 Park semi-arid savanna in South Africa (Archibald et al., 2009) and Virginia Park semi-arid savanna  
367 in Australia (Hutley et al., 2005).

368 Through comparative analysis, we found that most of the grasslands in the savanna ecosystem  
369 and arid and semi-arid areas are dominated by carbon sinks. The reason for the carbon emission  
370 status of grassland in this study may be related to the continuous reduction of rainfall in the study  
371 area in recent years (Fig. 8). Under this extremely dry and rainless climate condition, the carbon  
372 sequestration capacity of herbaceous plants with low vegetation productivity is significantly reduced.  
373 In the case of continuous reduction of rainfall in the future, the carbon emissions of grassland  
374 ecosystems in the study area may continue to increase. At the same time, the study area as a special  
375 heat island habitat in the global temperate zone. Under the climate scenario of continuous warming  
376 and decreasing precipitation in the future, the vegetation community structure in some temperate  
377 regions will succession to the savanna vegetation community. With the extension of drought and  
378 high temperature, grassland ecosystems in these areas may change from carbon sinks to carbon  
379 sources, which is extremely important for the carbon balance of global terrestrial ecosystems.

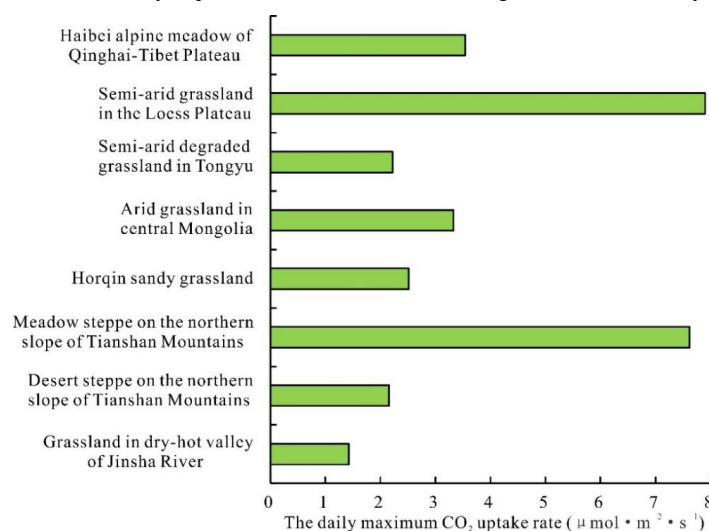

Figure 7 The daily maximum CO<sub>2</sub> uptake rate of different grassland ecosystems.





382

Table 2 Comparison of NEE in grassland ecosystems and savanna ecosystems.

| Country       | Location                                      | Latitude & longitude           | Vegetation                          | NEE (t C ha <sup>-1</sup> a <sup>-1</sup> ) | References                 |
|---------------|-----------------------------------------------|--------------------------------|-------------------------------------|---------------------------------------------|----------------------------|
| China         | Meitang                                       | 26°46.24' N, 107°28'12" E      | subtropical grassland               | -1.16                                       | Sun et al., 2020           |
|               | Heihe Dashalong Observation Station           | 38°50'23.64" N, 98°56'16" E    | marsh alpine meadow                 | -3.08                                       | Bai et al., 2022           |
|               | Heihe Arou Observation Station                | 38°25'0.28" N, 100°27'51.48" E | alpine meadow                       | -2.28                                       |                            |
|               | Xilin River Basin                             | 43°33'N, 116°40'E              | semi-arid grassland                 | -0.61                                       | Du et al., 2012            |
|               | Semi-arid Climate and Environment Observatory | 35°57'N, 104°08'E              | semi-arid grassland                 | -0.99                                       |                            |
|               | Tongyu Degraded Grassland Observatory         | 44°25'N, 122°52'E              | semi-arid grassland                 | -0.37                                       |                            |
|               | Yunwu Mountain National Nature Reserve        | 36°19'N, 106°28'E              | semi-arid grassland                 | -0.02                                       | Zhang et al., 2020         |
|               | Naiman Desertification Research Station       | 42°55'N, 120°42'E              | sandy grassland                     | 0.91                                        | Niu et al., 2018           |
|               | Naiman Desertification Research Station       | 42°55'N, 120°42'E              | enclosure of sandy grassland        | 0.96                                        | Chen et al., 2019          |
|               | Qinghai Lake                                  | 36°42'N, 100°46'E              | <i>Kobresia tibetica</i> wet meadow | 0.55                                        | Wu et al., 2018            |
|               | Jinsha River Field Observation Station        | 26°46.24' N, 101°49'41.68" E   | grassland savanna                   | 0.19                                        | This study                 |
|               | Yuanjiang                                     | 23°28'26"N, 102°10'39"E        | semi-arid savanna                   | -1.30                                       | Fei et al., 2017b          |
|               | Yanchi Research Station                       | 37°42.51'N, 107°13.62'E        | semi-arid shrub                     | -0.77                                       | Law et al., 2002           |
|               | Northwestern Benin                            | 09°44'24"N, 01°36'00"E         | cultivated savanna                  | -2.32                                       | Ago et al., 2014           |
|               | Bontoli                                       | 10°51'56"N, 03°42'22"W         | trees and shrub savanna             | -3.04                                       | Brümmer et al., 2008       |
| Sudan         | Kayoro Dakorenia                              | 10°55'4.8"N, 01°19'15.6"W      | fallow and cropland                 | 1.08                                        | Quansah et al., 2015       |
|               | Nazinga Park                                  | 11°09'7.20"N, 1°35'9.6"W       | nature reserve savanna              | -3.87                                       |                            |
|               | Sumbrugu Aguusi                               | 10°50'45.6"N, 0°55'1.2"W       | grassland savanna                   | 1.28                                        |                            |
| South Africa  | Kruger Park                                   | /                              | semi-arid savanna                   | 0.25                                        | Archibald et al., 2009     |
|               | Ca. 20 km east of Maun, Botswana              | 19°54'S, 23°33'E               | woodland savanna                    | -0.12                                       | Veenendaal et al., 2004    |
| West Africa   | Dahra field site                              | 15°24'00"N, 15°24'48"W         | shrub and tree savanna              | -2.71                                       | Tagesson et al., 2015      |
| Brazil        | Reserva Ecológica do IBGE                     | 15°56'S, 47°51'W               | trees and shrubs                    | -2.88                                       | Santos et al., 2003        |
| Spain         | El Llano de los Juanes                        | 36°55'41.7"N, 02°45'1.7"W      | mediterranean shrubland             | -0.02                                       | Serrano-Ortiz et al., 2009 |
| United States | Tonzi Ranch, California                       | 38°25'48"N, 120°57'00"W        | oak and grass savanna               | -0.98                                       | Ma et al., 2003            |
|               | Virginia Park                                 | 19°53'00"S, 146°33'14"E        | semi-arid savanna                   | 0.21                                        | Hutley et al., 2005        |
|               | Howard Springs                                | 12°30'24"S, 131°52'24"E        | mesic savanna                       | -1.55                                       |                            |
| Australia     | Pine Hill cattle station                      | 22°16'48"S, 133°15'00"E        | woodland savanna                    | -1.25                                       | Cleverly et al., 2013      |
|               | Central Australia                             | 22°18'00"S, 133°12'00"E        | acacia savanna                      | -2.58                                       | Eamus et al., 2013         |
|               | Howard Springs                                | 12°29'71"S, 131°09'03"E        | open-forest savanna                 | -3.60                                       | Beringer et al., 2007      |

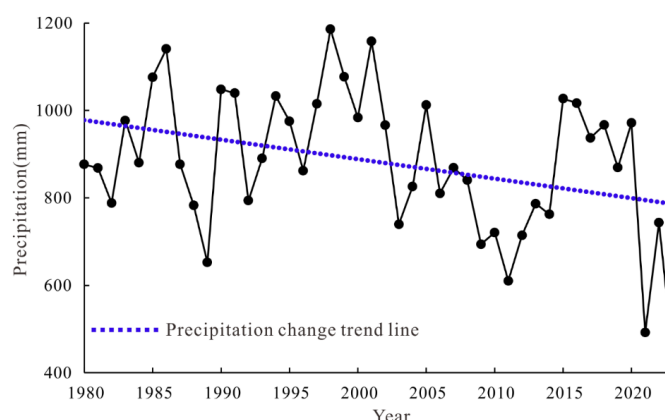

Figure 8 The precipitation changes in the study area from 1980 to 2023 (The precipitation data from 1980 to 2022 are collected from Yunnan Statistical Yearbook, and the precipitation data in 2023 were the measured data of Jinsha River Field Observation Station.).

## 4.2 Effects of environmental factors on CO<sub>2</sub> flux

### 4.2.1 Temperature factor

As a crucial environmental factor influencing the  $F_c$  of ecosystems, temperature mainly affects the  $F_c$  of terrestrial ecosystems by regulating biological activities such as photosynthesis and respiration (Woodwell et al., 1983; Pan et al., 2020; Johnston et al., 2021; Chen et al., 2023), especially for grassland ecosystems, several prior studies have validated that temperature serves as the primary driving force controlling the variation in  $F_c$ . Nevertheless, owing to variations in climate and environmental conditions, the regulatory impact of temperature fluctuations on the  $F_c$  differs significantly across various types of grassland ecosystems. Compared with temperate grassland and semi-arid grassland, the warming effect has the most significant impact on the carbon flux of frigid grasslands worldwide. However, in semi-arid grassland ecosystems, the effect of warming is not significant (Wang et al., 2019). The rise in temperature (both annual average temperature and annual average soil temperature) reduced the carbon flux of temperate grasslands in China, while the effect on alpine grasslands was opposite (Liu et al., 2024). In the Inner Mongolia Plateau, with the increase of temperature, the NEE of the grassland ecosystem will increase (Liu et al., 2018), while the change of Qinghai-Tibet Plateau, compared with it, is very small, and there is no correlation between  $F_c$  and temperature change in the Inner Mongolia grassland during the drought period (Hao et al., 2006).  $T_a$  and  $T_s$  exhibit a negative correlation with the  $F_c$  at different seasonal daily scales in the grassland ecosystem in dry-hot valley of JS, similar to the control mechanisms seen in other arid and semi-arid grasslands (Li et al., 2015; Niu et al., 2018; Chen et al., 2019). As the time series extends and the temporal scale increases, the impact of  $T_a$  and  $T_s$  on the fluctuations in the  $F_c$  in the grassland



of study region continues to weaken, which is related to the small differences in  $T_a$  and  $T_s$  within different time scales in the study area. That is, the small temperature difference leads to the distribution change of the  $F_c$  in time is not sensitive to temperature fluctuation, which is the same as the characteristics of the savanna ecosystem in YJ (Fei et al., 2017a). This phenomenon is also common in other arid regions (Wang et al., 2021).

#### 4.2.2 Water factor

Previous studies have pointed out that a potential limiting factor affecting carbon uptake in terrestrial ecosystems is soil moisture, which can diminish NPP through water stress in ecosystems, leading to vegetation death (Green et al., 2019). Simultaneously, soil moisture may exacerbate extreme climatic conditions through the intricate interaction between the land and the atmosphere. Particularly in arid regions characterized by scarce water resources, there exists a significant interaction between soil moisture and vegetation. Hence, in terms of carbon and water fluxes affecting dryland ecosystems, SWC is a more important ecosystem control factor than  $T_a$  (Zhang et al., 2012; Zou et al., 2016; Fei et al., 2017a; Tarin et al., 2020; Kannenberg et al., 2024). For instance, in the herbs growth season of the Qinghai–Tibet Plateau, regions with plentiful precipitation in the east and southeast primarily regulate carbon absorption capacity through temperature. Conversely, SWC emerges as the principal determinant of carbon sequestration capability in the arid and water shortage western region (Wang et al., 2021). Simultaneously, the SWC emerges also as the predominant factor influencing the daily fluctuations of NEE in grassland ecosystems in the semi-arid regions of northern China (Zhao et al., 2020). In the sandy grasslands of Horqin, the NEE during the plant growth season increases with the rise in SWC, while it decreases during the non-growth season (Chen et al., 2019). The research area is a classic dryland ecosystem characterized by scarce and concentrated precipitation. The driving effect of water on the ecosystem is obvious. Plant physiology is greatly affected by water stress. Higher SWC is conducive to promoting the recovery and growth of herbs (Jiang et al., 2017), and this enhancement in vegetation growth contributes significantly to augmenting the carbon sink capacity. Therefore, it can be observed that in the season with more rainfall, the study area has a carbon sink function due to higher SWC (Figure 2b), whereas in the dry season, it exhibits characteristics of carbon emissions.

In arid ecosystem, alterations in the  $P$  significantly affect plants and soil, especially the grassland ecosystem has the greatest response to the change of the  $P$ . The effectiveness of water dictates plants growth and the release and absorption of  $CO_2$ . Therefore, prior researches have indicated that the  $F_c$  of grasslands in arid regions exhibits greater sensitivity to variations in the  $P$  (Knapp et al., 2002; Niu et al., 2007; Weltzin et al., 2003; Zhang et al., 2020). An increase in the  $P$



441 led to a delay in the peak of gross primary productivity in vegetation growth stage of the Inner  
442 Mongolia desert steppe, enhancing the ecosystem's carbon flux (Li et al., 2017; Zhang et al., 2019).  
443 The decrease of the P significantly reduced the soil respiration in the early and middle vegetation  
444 growth season of Horqin sandy grassland (Wang et al., 2023). The P of Xilinhot grassland changed  
445 the Fc in the vegetation growth season mainly by affecting SWC (Wang et al., 2015). High water  
446 levels (annual average precipitation and soil moisture) have continuously increased the carbon flux  
447 of temperate grasslands and alpine grasslands in the Mongolian Plateau, Loess Plateau, and  
448 Qinghai–Tibet Plateau (Liu et al., 2024).

449 Changes in hydrological conditions such as the P and SWC can significantly affect the water  
450 balance characteristics and water redistribution of the savanna ecosystems due to the arid and hot  
451 climate environment characteristics, thereby altering the ecological system structure and vegetation  
452 community composition of woody and herbaceous plants coexisting (Yu et al., 2015; Lee et al.,  
453 2018; Jin et al., 2019; Zhang et al., 2019; Hoffmann, 2023; Mattos et al., 2023), thereby affecting  
454 vegetation productivity (Jin et al., 2018), ecological water use efficiency (Yu et al., 2015; Lee et al.,  
455 2018; Mattos et al., 2023), plant diversity (He, et al., 2024), and carbon flux (Fei et al., 2017a).  
456 Changes in hydrothermal conditions have formed the distinct vertical zonation structure of  
457 vegetation communities in the savanna of the JS (He, et al., 2024). The continuous decrease in the  
458 P led to a marked reduction in both the average height and coverage of the herbaceous community  
459 in the YJ. However, it significantly increased the species richness and evenness index of the  
460 herbaceous community (Jin et al., 2019). Observations of the Fc showed that the P determined the  
461 carbon sink change of the savanna ecosystem in the YJ (Fei et al., 2017a). As for the study area, the  
462 P shows a positive correlation with the Fc at different seasonal daily scales, with no significant  
463 relationship observed with the Fc variation on the daily and monthly scales throughout the year.  
464 However, the variation in P significantly affects the regional SWC and RH (Fig. 6c and 6d).  
465 Therefore, we suggests that the impact mechanism of the P on the Fc in the JS dry-hot valley  
466 grassland ecosystem may be similar to that of the Xilinhot grassland ecosystem, where the P mainly  
467 controls vegetation growth by affecting SWC and RH, thereby indirectly influencing the Fc in the  
468 grassland ecosystem.

#### 469 4.2.3 Relative humidity and vapor pressure deficit factor

470 The arid/semi-arid grassland ecosystem is short of water resources, the soil nutrients are  
471 relatively poor, and the ecosystem is fragile and sensitive. Especially with the change in global  
472 climate, RH has become a key limiting factor restricting its sustainable development (Wang et al.,  
473 2023). As an important measure of atmospheric dryness, the fluctuation of VPD is controlled by RH



474 and has a high correlation with other important driving factors of ecosystem productivity, such as  
475  $T_a$  and SWC, which is a key climate regulation factor affecting ecosystem photosynthesis and  
476 transpiration. Multiple studies have shown that when RH decreases, vegetation stomata will be  
477 closed due to an increase in VPD, thereby preventing excessive water loss (Williams et al., 2013;  
478 Novick et al., 2016; Sulman et al., 2016; Hsu et al., 2021), leading to a decrease in the photosynthetic  
479 rate of leaves and canopies, thereby inhibiting photosynthesis (McDowell et al., 2015; Sulman et  
480 al., 2016; Yuan et al., 2019), reducing vegetation productivity and hindering vegetation growth.  
481 Therefore, there is a mainly negative correlation between the intensity of plant photosynthesis and  
482 VPD. Zhong et al. (2023) discovered that excluding the influences of  $T_a$  and soil moisture on  
483 vegetation productivity, VPD negatively impacts vegetation productivity in the majority of Northern  
484 Hemisphere regions. Globally, studies have also shown that increased VPD reduces global  
485 vegetation growth and offsets the beneficial impacts of  $CO_2$  fertilization (Yuan et al., 2019).  
486 Simultaneously, the interannual variation of VPD shows a significant negative correlation with net  
487 ecosystem productivity and affects the interannual variation of atmospheric  $CO_2$  growth rate (He et  
488 al., 2022). Because of variations in climatic conditions and the synergistic effects of multiple  
489 environmental factors, the response mechanisms of the  $F_c$  in different grassland ecosystems to  
490 changes in VPD and RH are also varied. For instance, in the savanna ecosystem of YJ, the  $F_c$  shows  
491 a negative correlation with VPD (Fei et al., 2017a). Wang et al. (2021) found through a study on the  
492 spatial variation of carbon flux of 10 distinct grassland types that a positive correlation exists  
493 between VPD and NEE in the Qinghai–Tibet Plateau. In the arid grasslands of Heihe River Basin  
494 (Bai et al., 2022), the  $F_c$  is positively correlated with VPD and RH. The  $F_c$  at the daily scale exhibit  
495 a positive correlation with RH and a negative correlation with VPD during different seasons in the  
496 study area. Taking into account the seasonal changes in different environmental factors (Fig. 2c),  
497 during the dry season, the RH is low, VPD is high. The ecosystem exhibits a carbon emission state,  
498 while the opposite is observed during the rainy season. Generally, the reduction in RH and the  
499 increase in VPD will inhibit the ecosystem's carbon absorption capacity.

## 500 **5 Conclusions**

501 This study quantitatively analyzed the  $F_c$  variations and their relationships with environmental  
502 factors in the grassland ecosystem of the dry-hot valley of JS, enriching the theoretical  
503 understanding of key carbon cycling processes in the savanna ecosystem in China. Nonetheless, the  
504 absence of long-term observational data on the  $F_c$  in our study precludes a more thorough  
505 examination of the inter-annual variation characteristics of the  $F_c$ . Secondly, the study did not



effectively observe the dynamic characteristics of soil respiration, making it impossible to accurately calculate the GPP of the ecosystem. Furthermore, we only observed and studied the changes in  $F_c$  of the grassland ecosystem, while the savanna ecosystem has a vegetation community structure with two levels of shrub and grass. Therefore, forthcoming our research will emphasize the extended observation of the  $F_c$  changes in the savanna ecosystem with a complete vegetation community structure, especially the use of eddy correlation methods to expand the scope of ecosystem observation and reduce the uncertainty of measurement samples, so as to better clarify the carbon budget pattern of the ecosystem. Through this research, we have arrived at the following findings:

(1) The diurnal variation of  $F_c$  showed a 'W' shaped bimodal curve during the dry season. The maximum daily  $\text{CO}_2$  emission rate reached  $0.2158 \mu\text{mol}\cdot\text{m}^{-2}\cdot\text{s}^{-1}$  in March, with the highest cumulative  $\text{CO}_2$  emission of  $20.64 \text{ g}\cdot\text{m}^{-2}$  observed in May. During the rainy season, the diurnal variation of  $F_c$  in the ecosystem showed a 'U' shaped unimodal curve. The maximum daily  $\text{CO}_2$  absorption rate reached  $1.4286 \mu\text{mol}\cdot\text{m}^{-2}\cdot\text{s}^{-1}$  in August, with the highest cumulative  $\text{CO}_2$  absorption of  $24.41 \text{ g}\cdot\text{m}^{-2}$  observed in September.

(2) In the rainy season existed a notable correlation between PAR and  $F_c$ . Especially during the daytime, the relationship between  $F_c$  and PAR followed a rectangular hyperbolic model. When PAR reached the light saturation point, the photosynthetic rate of the ecosystem would peak, and the light response curve would gradually level off. Additionally, when PAR was high, the  $F_c$  of the ecosystem was also impacted by other driving factors.

(3) The diurnal variation of  $F_c$  in the dry season is mainly affected by RH, while the rainy season is mainly affected by RH and VPD. Small temperature differences result in a relatively weak overall impact of  $T_a$  and  $T_s$  on the  $F_c$  of the ecosystem. P mainly indirectly controls the vegetation growth and the  $F_c$  by influencing SWC and RH. Overall, SWC, RH, and VPD were the main environmental factors influencing the  $F_c$ . As SWC and RH rise while VPD declines, the ecosystem's carbon absorption capacity experiences a notable enhancement.

(4) Affected by environmental factors, the  $F_c$  of the grassland ecosystem exhibited significant seasonal characteristics. During the dry season, the ecosystem showed carbon emissions, with a cumulative  $\text{CO}_2$  emission of  $1.3215 \text{ t}\cdot\text{ha}^{-1}$ . During the rainy season, the ecosystem showed carbon absorption, with a cumulative  $\text{CO}_2$  absorption of  $0.6137 \text{ t}\cdot\text{ha}^{-1}$ . Throughout the year, the ecosystem was a weak carbon source. In the case of continuous reduction of P in the future, the carbon emissions of the ecosystem may continue to increase.

**Data availability**



539 The CO<sub>2</sub> flux data and environmental data used to support the findings of this study were  
540 available from the corresponding author upon request. The administrative boundary data  
541 (DOI:10.12078/2023010101; DOI:10.12078/2023010103) and river data  
542 (DOI:10.12078/2018060101) were downloaded from the RESDC from the Chinese Academy of  
543 Sciences (<https://www.resdc.cn/Default.aspx>).

#### 544 **Author contributions**

545 All authors were involved in the preparation and design of the manuscript. Chaolei Yang wrote  
546 the manuscript, and all authors provided feedback and suggestions for revision. Yufeng Tian and  
547 Jingqi Cui processed and analyzed the research data. Zong Wei, Yong Huang, and Aihua Jiang are  
548 mainly responsible for the daily maintenance and data collection of monitoring instruments. All the  
549 authors have read and passed the final manuscript.

#### 550 **Competing interests**

551 The authors has declared that no conflict of interest.

#### 552 **Financial support**

553 This study received funding from the China Geological Survey (grant nos. DD20220888) and  
554 the National Natural Science Foundation of China (grant nos. U2102209).

555

#### 556 **References**

- 557 Archibald, S.A., Kirton, A., van der Merwe, M.R., Scholes, R.J., Williams, C.A., Hanan, N.: Drivers  
558 of inter-annual variability in net ecosystem exchange in a semi-arid savanna ecosystem, South  
559 Africa, *Biogeosci.*, 6, 251–266, 2009.
- 560 Ago, E.E., Agbossou, E.K., Galle, S., Cohard, J.M., Heinesch, B., Aubinet, M.: Long term  
561 observations of carbon dioxide exchange over cultivated savanna under a Sudanian climate in  
562 Benin (West Africa), *Agric. For. Meteorol.*, 197, 13–25,  
563 <https://doi.org/10.1016/j.agrformet.2014.06.005>, 2014.
- 564 Arslan, A.M., Wang, X., Liu, B.Y., Xu, Y.N., Li, L., Gong, X.Y.: Photosynthetic resource-use  
565 efficiency trade-offs triggered by vapour pressure deficit and nitrogen supply in a C<sub>4</sub> species,  
566 *Plant Physiol. Biochem.*, 197, 107666, <https://doi.org/10.1016/j.plaphy.2023.107666>, 2023.
- 567 Bousquet, P., Ciais, P., Miller, J.B., Dlugokencky, E.J., Hauglustaine, D.A., Prigent, C., White, J.:  
568 Contribution of anthropogenic and natural sources to atmospheric methane variability, *Nature*,  
569 443, 439–443, <https://doi.org/10.1038/nature05132>, 2006.
- 570 Beringer, J., Hutley, L.B., Tapper, N.J., Cernusak, L.A.: Savanna fires and their impact on net  
571 ecosystem productivity in North Australia, *Global Change Biol.*, 13, 990–1004,  
572 <https://doi.org/10.1111/j.1365-2486.2007.01334.x>, 2007.
- 573 Brümmer, C., Falk, U., Papen, H., Szarzynski, J., Wassmann, R., Brüggemann, N.: Diurnal, seasonal,  
574 and interannual variation in carbon dioxide and energy exchange in shrub savanna in Burkina  
575 Faso (West Africa), *J. Geophys. Res.: Biogeosci.*, 113, <https://doi.org/Artn>



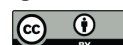

- 576 G0203010.1029/2007jg000583, 2008.
- 577 Bai, Y.F., Cotrufo, M.F.: Grassland soil carbon sequestration: current understanding, challenges, and  
578 solutions, *Science*, 377, 603–608, <https://doi.org/10.1126/science.abo2380>, 2022.
- 579 Bai, X.J., Wang, X.F., Liu, X.H., Zhou, X.Q.: Dynamics and driving factors of carbon fluxes in  
580 wetland, cropland and grassland ecosystems in Heihe river basin, *Remote Sens. Technol. Appl.*,  
581 37, 94–107, <https://doi.org/10.11873/j.issn.1004-0323.2022.1.0094>, 2022.
- 582 Bai, X.Y., Zhang, S.R., Li, C.J., Xiong, L., Song, F.J., Du, C.C., Li, M.H., Luo, Q., Xue, Y.Y., Wang,  
583 S.J.: A carbon-neutrality-capacity index for evaluating carbon sink contributions, *Environ. Sci.*  
584 *Ecotechnol.*, 15, 100237, <https://doi.org/10.1016/j.ese.2023.100237>, 2023.
- 585 Bureau of Statistics of Yunnan Province. Yunnan Statistical Yearbook; China Statistics Press:  
586 Beijing, China, 2023.
- 587 Campbell, G.S., Norman, J.M.: An introduction to environmental biophysics, Springer Sci, Business  
588 Media, 2012.
- 589 Cleverly, J. Boulain, N., Villalobos-Vega, R., Grant, N., Faux, R., Wood, C., Cook, P.G., Yu, Q.,  
590 Leigh, A., Eamus, D.: Dynamics of component carbon fluxes in a semi-arid Acacia woodland,  
591 central Australia, *J. Geophys. Res.: Biogeosci.*, 118, 1168–1185,  
592 <https://doi.org/10.1002/jgrg.20101>, 2013.
- 593 Chen, Y.P., Niu, Y.Y., Li, W., Li, Y.Q., Gong, X.W., Wang, X.Y.: Characteristics of carbon flux in  
594 sandy grassland ecosystem under natural restoration in Horqin sandy land, *Plateau Meteorol.*, 38,  
595 650–659, <https://doi.org/10.7522/j.issn.1000-0534.2018.00133>, 2019.
- 596 Cui, H.C.: Challenges and approaches to crop improvement through C<sub>3</sub>-to-C<sub>4</sub> engineering, *Front.*  
597 *Plant Sci.*, 12, 715391, <https://doi.org/10.3389/fpls.2021.715391>, 2021.
- 598 Chen, W.N., Wang, S., Wang, J.S., Xia, J.Y., Luo, Y.Q., Yu, G.R., Niu, S.L.: Evidence for widespread  
599 thermal optimality of ecosystem respiration, *Nat. Ecol. Evol.*, 7, 1379–1387,  
600 <https://doi.org/10.1038/s41559-023-02121-w>, 2023.
- 601 Du, Q., Liu, H.Z., Feng, J.W., Wang, L., Huang, J.P., Zhang, W., Bernhofer, C.: Carbon dioxide  
602 exchange processes over the grassland ecosystems in semiarid areas of China, *Sci. China, Ser.*  
603 *D Earth Sci.*, 42, 711–722, <https://doi.org/10.1007/s11430-011-4283-1>, 2012.
- 604 Dobson, A., Hopcraft, G., Mduma, S., Ogutu, J.O., Fryxell, J., Anderson, M., Archibald, S.,  
605 Lehmann, C., Poole, J., Caro, T., Mulder, M.B., Holt, R.D., Berger, J., Rubenstein, D.I.,  
606 Kahumbu, P., Chidumayo, E.N., Milner-Gulland, E.J., Schluter, D., Otto, S., Balmford, A.,  
607 Wilcove, D., Pimm, S., Veldman, J.W., Olf, H., Noss, R., Holdo, R., Beale, C., Hempson, G.,  
608 Kiwango, Y., Lindenmayer, D., Bond, W., Ritchie M., Sinclair, A.R.E.: Savannas are vital but  
609 overlooked carbon sinks, *Science*, 375, 392, <https://doi.org/10.1126/science.abn4482>, 2022.
- 610 Deng, Y.: The boundary definition and study on the land use/cover change and landscape pattern of  
611 the dry-hot valley in Hengduan Mountains, Yunnan University, <https://doi.org/10.27456/d.cnki.gyndu.2022.000408>, 2022.
- 612
- 613 Eamus, D., Hutley, L.B., O’Grady, A.P.: Daily and seasonal patterns of carbon and water fluxes  
614 above a north Australian savanna, *Tree Physiol.*, 21, 977–988, 2001.
- 615 Fang, J.Y., Guo, Z.D., Piao, S.L., Chen, A.P.: Terrestrial vegetation carbon sinks in China, 1981–  
616 2000. *Sci. China Ser. D: Earth Sci.*, 50, 1341–1350, <https://doi.org/10.1007/s11430-007-0049-1>,  
617 2007.
- 618 Fei, X.H., Song, Q.H., Zhang, Y.P., Liu, Y.T., Sha, L.Q., Yu, G.R., Zhang, L.M., Duan, C.Q., Deng,  
619 Y., Wu, C.S., Lu, Z.Y., Luo, K., Chen, A.G., Xu, K., Liu, W.W., Huang, H., Jin, Y.Q., Zhou,



- 620 R.W., Li, J., Lin, Y.X., Zhou, L.G., Fu, Y., Bai, X.L., Tang, X.H., Gao, J.B., Zhou, W.J., Grace,  
621 J.: Carbon exchanges and their responses to temperature and precipitation in forest ecosystems  
622 in Yunnan, Southwest China, *Sci. Total Environ*, 616–617, 824–840,  
623 <https://doi.org/10.1016/j.scitotenv.2017.10.239>, 2017a.
- 624 Fei, X.H., Jin, Y.Q., Zhang, Y.P., Sha, L.Q., Liu, Y.T., Song, Q.H., Zhou, W.J., Liang, N.S., Yu, G.R.,  
625 Zhang, L.M., Zhou, R.W., Li, J., Zhang, S.B., Li, P.G.: Eddy covariance and biometric  
626 measurements show that a savanna ecosystem in Southwest China is a carbon sink, *Sci Rep*, 7,  
627 41025, <https://doi.org/10.1038/srep41025>, 2017b.
- 628 Grace, J., Lloyd, J., McIntyre, J., Miranda, A.C., Meir, P., Miranda, H., Moncrieff, J.M., Massheder,  
629 J., Wright, I.R., Gash, J.: Fluxes of carbon dioxide and water vapour over an undisturbed  
630 tropical forest in south-west Amazonia, *Global Change Biol*, 1, 1–12,  
631 <https://doi.org/10.1111/j.1365-2486.1995.tb00001.x>, 1995.
- 632 Grace, J., José, J. S., Meir, P., Miranda, H. S., Montes, R.A.: Productivity and carbon fluxes of  
633 tropical savannas, *J. Biogeogr*, 33, 387–400, <https://doi.org/10.1111/j.1365-2699.2005.01448.x>,  
634 2006.
- 635 Green, J. K., Seneviratne, S. I., Berg, A. M., Findell, K. L., Hagemann, S., Lawrence, D. M., Gentile,  
636 P.: Large influence of soil moisture on long-term terrestrial carbon uptake, *Nature*, 565, 476–479,  
637 <https://doi.org/10.1038/s41586-018-0848-x>, 2019.
- 638 Guo, W.Z., Jing, C.Q., Deng, X.J., Chen, C., Zhao, W.K., Hou, Z.X., Wang, G.X.: Variations in  
639 carbon flux and factors influencing it on the northern slopes of the Tianshan Mountains, *Acta*  
640 *Prataculturae Sin*, 31, 1–12. <https://doi.org/10.11686/cyxb2021137>, 2022.
- 641 He, Y.B., Lu, P.Z., Zhu, T.: Causes for the formation of dry-hot valleys in Hengduan Mountain-  
642 Yunnan plateau, *Resour. Sci*, 22, 69–72, <https://www.resci.cn/CN/Y2000/V22/I5/69>, 2000.
- 643 Houghton, R.A.: Counting terrestrial sources and sinks of carbon, *Clim. Change*, 48, 525–534,  
644 <https://doi.org/10.1023/A:1005658316062>, 2001.
- 645 Hutley, L.B., Leuning, R., Beringer, J., Cleugh, H.A.: The utility of the eddy covariance techniques  
646 as a tool in carbon accounting: tropical savanna as a case study, *Aust. J. Bot*, 53, 663–675,  
647 <https://doi.org/10.1071/Bt04147>, 2005.
- 648 Hao, Y.B., Wang, Y.F., Sun, X.M., Huang, X.Z., Cui, X.Y., Niu, H.S., Zhang, Y.H., Yu, G.R.:  
649 Seasonal variation in carbon exchange and its ecological analysis over *Leymus chinensis* steppe  
650 in Inner Mongolia, *Sci. China, Ser. D Earth Sci*, 49, 186–195, [https://doi.org/10.1007/s11430-](https://doi.org/10.1007/s11430-006-8186-5)  
651 006-8186-5, 2006.
- 652 Hu, Y., Zhu, X.P., Jia, H.T., Han, D.L., Hu, B.A., Li, D.P.: Effects of fencing on ecosystem carbon  
653 exchange at meadow steppe in the northern slope of the Tianshan Mountains, *Chinese J. Plant*  
654 *Eco*, 42, 372–381, <https://doi.org/10.17521/cjpe.2016.0049>, 2018.
- 655 Hsu, P.K., Takahashi, Y., Merilo, E., Costa, A., Zhang, L., Kernig, K., Lee, K.H., Schroeder, J.I.:  
656 Raf-like kinases and receptor-like (pseudo)kinase GHR1 are required for stomatal vapor  
657 pressure difference response, *PNAS*, 118, e2107280118, <https://doi.org/10.1073/pnas.21072801>,  
658 2021.
- 659 He, B., Chen, C., Lin, S.R., Yuan, W.P., Chen, H.W., Chen, D.L., Zhang, Y.F., Guo, L.L., Zhao, X.,  
660 Liu, X.B., Piao, S.L., Zhong, Z.Q., Wang, R., Tang, R.: Worldwide impacts of atmospheric vapor  
661 pressure deficit on the interannual variability of terrestrial carbon sinks, *Natl. Sci. Rev*, 9,  
662 nwab150, <https://doi.org/10.1093/nsr/nwab150>, 2022.
- 663 Hoffmann, W.A.: Seasonal flooding shapes forest–savanna transitions, *PNAS*, 120, e2312279120,



- 664 <https://doi.org/10.1073/pnas.2312279120>, 2023.
- 665 He, G.X., Shi, Z.T., Fang, H.D., Shi, L.T., Wang, Y.D., Yang, H.Z., Yan, B.G., Yang, C.L., Yu, J.L.,  
666 Liang, Q.L., Zhao, L., Jiang, Q.: Climate and soil stressed elevation patterns of plant species to  
667 determine the aboveground biomass distributions in a valley-type Savanna, *Front. Plant Sci.*, 15,  
668 1324841, <https://doi.org/10.3389/fpls.2024.1324841>, 2024.
- 669 Jin, Z.Z., Ou, X.K., Zhou, Y.: The general situation of natural vegetation in dry-hot river valley of  
670 Yuanmou, Yunnan Province, *Chin. J. Plant Ecol.*, 11, 308–317, 1987.
- 671 Jiang, J.M., Fei, S.M., He, Y.P., Zhang, F., Kong, Q.H.: Study on vegetation restoration in dry-hot  
672 valleys of the Jinsha River, *J. Southwest For. Univ.*, 27, 11–15,  
673 <https://doi.org/10.11929/j.issn.2095-1914.2007.06.003>, 2007.
- 674 Jin, Y.Q., Li, J., Liu, C.G., Liu, Y.T., Zhang, Y.P., Song, Q.H., Sha, L.Q., Chen, A.G., Yang, D.X.,  
675 Li, P.G.: Response of net primary productivity to precipitation exclusion in a savanna ecosystem,  
676 *For. Ecol. Manage.*, 29, 69–76, <https://doi.org/10.1016/j.foreco.2018.07.007>, 2018.
- 677 Jin, Y.Q., Li, J., Liu, C.G., Liu, Y.T., Zhang, Y.P., Song, Q.H., Sha, L.Q., Balasubramanian, D., Chen,  
678 A.G., Yang, D.X., Li, P.G.: Precipitation reduction alters herbaceous community structure and  
679 composition in a savanna, *J. Veg. Sci.*, 30, 821–831, <https://doi.org/10.1111/jvs.12766>, 2019.
- 680 Johnston, A.S.A., Meade, A., Ardö, J., Arriga, N., Black, A., Blanken, P.D., Bonalo, D., Brümmer,  
681 C., Cescatti, A., Dušek, J., Grafo, A., Gioli, B., Godedo, I., Gougho, C.M., Ikawa, H., Jassalo,  
682 R., Kobayashi, H., Magliulo, V., Mancao, G., Montagnani, L., Moyano, F.E., Olesen, J.E., Sachs,  
683 T., Shao, C.L., Tagesson, T., Wohlfahrt, G., Wolfo, S., Woodgate, W., Varlagin, A., Venditti, C.:  
684 Temperature thresholds of ecosystem respiration at a global scale, *Nat. Ecol. Evol.*, 5, 487–494,  
685 <https://doi.org/10.1038/s41559-021-01398-z>, 2021.
- 686 Knapp, A., Fay, P.A., Blair, J.M., Collins, S., Smith, M.D., Carlisle, J.D., Harpper, C.W., Danner,  
687 B.T., Lett, M.S., Mccarron, J.: Rainfall variability, carbon cycling, and plant species diversity in  
688 a mesic grassland, *Science*, 298, 2202–2205, <https://doi.org/10.1126/science.1076347>, 2002.
- 689 Kato, T., Tang, Y.H., Gu, S., Hirota, M., Du, M.Y., Li, Y.N., Zhao, X.Q.: Temperature and biomass  
690 influences on interannual changes in CO<sub>2</sub> exchange in an alpine meadow on the Qinghai-Tibetan  
691 Plateau, *Global Change Biol.*, 12, 1285–1298, <https://doi.org/10.1111/j.1365-2486.2006.01153.x>, 2006.
- 693 Kannenberg, S.A., Anderegg, W.R.L., Barnes, M.L., Dannenberg, M.P., Knapp, A.K.: Dominant  
694 role of soil moisture in mediating carbon and water fluxes in dryland ecosystems, *Nat. Geosci.*,  
695 17, 38–43, <https://doi.org/10.1038/s41561-023-01351-8>, 2024.
- 696 Law, B.E., Falge, E., Gu, L., Baldocchi, D.D., Bakwin, P., Berbigier, P., Davis, K., Dolman, A.J.,  
697 Falk, M., Fuentes, J.D., Goldstein, A., Granier, A., Grelle, A., Hollinger, D., Janssens, I.A.,  
698 Jarvis, P., Jensen, N.O., Katul, G., Mahli, K., Matteucci, G., Meyers, T., Monson, R., Munger,  
699 W., Oechel, W., Olson, R., Pilegaard, K., Paw U, K. T., Thorgeirsson, H., Valentini, R., Verma,  
700 Shashi, Vesala, T., Wilson, K., Wofsy, S.: Environmental controls over carbon dioxide and water  
701 vapor exchange of terrestrial vegetation, *Agric. For. Meteorol.*, 113, 97–120,  
702 [https://doi.org/10.1016/S0168-1923\(02\)00104-1](https://doi.org/10.1016/S0168-1923(02)00104-1), 2002.
- 703 Li, S.G., Asanuma, J., Eugster, W., Kotani, A., Liu, J.J., Urano, T., Oikawa, T., Davaa, G.,  
704 Oyumbaatar, D., Sugita, M.: Net ecosystem carbon dioxide exchange over grazed steppe in  
705 central Mongolia, *Global Change Biol.*, 11, 1941–1955, <https://doi.org/10.1111/j.1365-2486.2005.01047.x>, 2005.
- 707 Livesley, S. J., Grover, S., Hutley, L.B., Jamali, H., Butterbach-Bahl, K., Fest, B., Arndt, S. K.:



- 708 Seasonal variation and fire effects on CH<sub>4</sub>, N<sub>2</sub>O and CO<sub>2</sub> exchange in savanna soils of northern  
709 Australia, *Agric. For. Meteorol.*, 151, 1440–1452,  
710 <https://doi.org/10.1016/j.agrformet.2011.02.001>, 2011.
- 711 Li, J.X., Zeng, H., Zhu, J.T., Zhang, Y.J., Chen, N., Liu, Y.J.: Responses of different experimental  
712 warming on ecosystem respiration in Tibetan alpine meadow, *Ecol. Environ. Sci.*, 25, 1612–1620,  
713 <https://doi.org/10.16258/j.cnki.1674-5906.2016.10.004>, 2016.
- 714 Li, G.Y., Han, H.Y., Du, Y., Hui, D.F., Xia, J.Y., Niu, S.L., Li, X.N., Wan, S.Q.: Effects of warming  
715 and increased precipitation on net ecosystem productivity: a long-term manipulative experiment  
716 in a semiarid grassland, *Agric. For. Meteorol.*, 232, 359–366,  
717 <http://dx.doi.org/10.1016/j.agrformet.2016.09.004>, 2017.
- 718 Liu, D., Li, Y., Wang, T., Peylin, P., MacBean, N., Ciais, P., Jia, G., Ma, M.G., Ma, Y.M., Shen,  
719 M.G., Zhang, X.Z., Piao, S.L.: Contrasting responses of grassland water and carbon exchanges  
720 to climate change between Tibetan Plateau and InnerMongolia, *Agric. For. Meteorol.*, 249, 163–  
721 175, <https://doi.org/10.1016/j.agrformet.2017.11.034>, 2018.
- 722 Lee, E., Kumar, P., Barron-Gafford, G.A., Hendryx, S.M., Sanchez-Cañete, E.P., Minor, R.L.,  
723 Colella, T., Scott, R.L.: Impact of hydraulic redistribution on multispecies vegetation water use  
724 in a semiarid savanna ecosystem: an experimental and modeling synthesis, *Water Resour. Res.*,  
725 54, 4009–4027, <https://doi.org/10.1029/2017WR021006>, 2018.
- 726 Liu, J.X., Wang, Z., Duan, Y.F., Li, X.R., Zhang, M.Y., Liu, H.Y., Xue, P., Gong, H.B., Wang, X.,  
727 Chen, Y., Geng, Y.N.: Effects of land use patterns on the interannual variations of carbon sinks  
728 of terrestrial ecosystems in China, *Ecol. Indic.*, 146, 109914,  
729 <https://doi.org/10.1016/j.ecolind.2023.109914>, 2023.
- 730 Liu, Z.G., Chen, Z., Yang, M., Hao, T.X., Yu, G.R., Zhu, X.J., Zhang, W.K., Ma, L.X., Dou, X.J.,  
731 Lin, Y., Luo, W.X., Han, L., Sun, M.Y., Chen, S.P., Dong, G., Gao, Y.H., Hao, Y.B., Jiang, S.C.,  
732 Li, Y.N., Li, Y.Z., Liu, S.M., Shi, P.L., Tang, Y.K., Xin, X.P., Zhang, F.W., Zhang, Y.J., Zhao, L.,  
733 Zhou, L., Zhu, Z.L.: Precipitation consistently promotes, but temperature oppositely drives  
734 carbon fluxes in temperate and alpine grasslands in China, *Agric. For. Meteorol.*, 344, 109811,  
735 <https://doi.org/10.1016/j.agrformet.2023.109811>, 2024.
- 736 Miranda, A.C., Miranda, H.S., Lloyd, J., Grace, J., Francey, R.J., McIntyre, J.A., Meir, P., Riggan,  
737 P., Lockwood, R., Brass, J.: Fluxes of carbon, water and energy over Brazilian cerrado, an  
738 analysis using eddy covariance and stable isotopes, *Plant Cell Environ.*, 20, 315–328,  
739 <https://doi.org/10.1046/j.1365-3040.1997.d01-80.x>, 1997.
- 740 Malhi, Y., Nobre, A., Grace, J., Kruijt, B., Pereira, M., Culf, A., Scott, S.: Carbon dioxide transfer  
741 over a central Amazonian rain forest, *J. Geophys. Res.*, 103, 31593–31612,  
742 <https://doi.org/10.1029/98JD02647>, 1998.
- 743 Ma, S.Y., Baldocchi, D.D., Xu, L.K., Hehn, T.: Inter-annual variability in carbon dioxide exchange  
744 of an oak/grass savanna and open grassland in California, *Agric. For. Meteorol.*, 147, 157–171.  
745 <https://doi.org/10.1016/j.agrformet.2007.07.008>, 2007.
- 746 Millard, P., Midwood, A. J., Hunt, J.E., Whitehead, D., Boutton, T.W.: Partitioning soil surface CO<sub>2</sub>  
747 efflux into autotrophic and heterotrophic components, using natural gradients in soil δ<sup>13</sup>C in an  
748 undisturbed savannah soil, *Soil Biol. Biochem.*, 40, 1575–1582,  
749 <https://doi.org/10.1016/j.soilbio.2008.01.011>, 2008.
- 750 McDowell, N.G., Allen, C.D.: Darcy’s law predicts widespread forest mortality under climate  
751 warming, *Nat. Clim. Change*, 5, 669–72, <https://doi.org/10.1038/nclimate2641>, 2015.



- 752 Mattos, C.R.C., Hirota, M., Oliveira, R.S., Flores, B.M., Miguez-Macho, G., Pokhrel, Y., Fan, Y.:  
753 Double stress of waterlogging and drought drives forest–savanna coexistence, *PNAS*, 120,  
754 e2301255120, <https://doi.org/10.1073/pnas.2301255120>, 2023.
- 755 Niu, S.L., Wu, M.Y., Han, Y., Xia, J.Y., Li, L.H., Wan, S.Q.: Water-mediated responses of ecosystem  
756 carbon fluxes to climatic change in a temperate steppe, *New Phytol*, 177, 209–219,  
757 <https://doi.org/10.1111/j.1469-8137.2007.02237.x>, 2017.
- 758 Novick, K.A., Miniati, C.F., Vose, J.M.: Drought limitations to leaf-level gas exchange: results from  
759 a model linking stomatal optimization and cohesion–tension theory, *Plant Cell Environ*, 39, 583–  
760 96, <https://doi.org/10.1111/pce.12657>, 2016.
- 761 Niu, Y.Y., Li, Y.Q., Wang, X.Y., Gong, X.W., Luo, Y.Q., Tian, D.Y.: Characteristics of annual  
762 variation in net carbon dioxide flux in a sandy grassland ecosystem during dry years, *Acta*  
763 *Prataculturae Sin*, 27, 215–221, <https://doi.org/10.11686/cyxb2017231>, 2018.
- 764 Peel, M.C., Finlayson, B.L., McMahon, T.A.: Updated world map of the Köppen-Geiger climate  
765 classification, *Hydrol. Earth Syst. Sci.* 11, 1633–1644, [https://doi.org/10.5194/hess-11-1633-](https://doi.org/10.5194/hess-11-1633-2007)  
766 2007, 2007.
- 767 Piao, S.L., Huang, M.T., Liu, Z., Wang, X.H., Ciais, P., Canadell, J.G., Wang, K., Bastos, A.,  
768 Friedlingstei, P., Houghto, R.A., Quéré, C.L., Liu, Y.W., Myneni, R.B., Peng, S.S., Pongratz, J.,  
769 Sitch, S., Yan, T., Wang, Y.L., Zhu, Z.C., Wu, D.H., Wang, T.: Lower land-use emissions  
770 responsible for increased net land carbon sink during the slow warming period, *Nat. Geosci.* 11,  
771 739–743, <https://doi.org/10.1038/s41561-018-0204-7>, 2018.
- 772 Pan, S.F., Yang, J., Tian, H.Q., Shi, H., Chang, J.F., Ciais, P., Francois, L., Frieler, K., Fu, B.J.,  
773 Hickler, T., Ito, A., Nishina, K., Ostberg, S., Reyer, C.P.O., Schaphoff, S., Steinkamp, J., Zhao,  
774 F.: Climate extreme versus carbon extreme: responses of terrestrial carbon fluxes to temperature  
775 and precipitation, *J. Geophys. Res.: Biogeosci.* 125, e2019JG005252,  
776 <https://doi.org/10.1029/2019JG005252>, 2020.
- 777 Quansah, E., Mauder, M., Balogun, A.A., Amekudiz, L.K., Hingerl, L., Bliefernicht, J., Kunstmann,  
778 H.: Carbon dioxide fluxes from contrasting ecosystems in the Sudanian savanna in West Africa,  
779 *Carbon Balance Manage*, 10, 1, <https://doi.org/10.1186/s13021-014-0011-4>, 2015.
- 780 Ruimy, A., Jarvis, P.G., Baldocchi, D.D., Saugier, B.: CO<sub>2</sub> fluxes over plant canopies and solar  
781 radiation: a review, *Adv. Ecol. Res.* 26, 1–68, [https://doi.org/10.1016/s0065-2504\(08\)60063-x](https://doi.org/10.1016/s0065-2504(08)60063-x),  
782 1995.
- 783 Santos, A.J.B., Silva, G.T.D.A., Miranda, H.S., Miranda, A.C., Lloyd, J.: Effects of fire on surface  
784 carbon, energy and water vapour fluxes over campo sujo savanna in central Brazil, *Funct. Ecol.*  
785 17, 711–719, <https://doi.org/10.1111/j.1365-2435.2003.00790.x>, 2003.
- 786 Saleska, S.R., Millar, S.D., Martos, D.M., Goulden, M.L., Wofsy, S.C., da Rocha, H.R., De Camargo,  
787 P.B., Crill, P., Daule, B.C., De Freitas, H.C., Hutyrá, L., Keller, M., Kirchhoff, V., Menton, M.,  
788 Munger, J.W., Pyle, E.H., Rice, A.H., Silva, H.: Carbon in Amazon forests: unexpected seasonal  
789 fluxes and disturbance-induced losses, *Science*, 302, 1554–1557,  
790 <https://doi.org/10.1126/science.1091165>, 2003.
- 791 Serrano-Ortiz, P., Domingo, F., Cazorla, A., Were, A., Cuezva, S., Villagarcía, L., Alados-Arboledas,  
792 L., Kowalski, A.S.: Interannual CO<sub>2</sub> exchange of a sparse mediterranean shrubland on a  
793 carbonaceous substrate, *J. Geophys. Res.: Biogeosci.* 114, <https://doi.org/Artn>  
794 G0401510.1029/2009jg000983, 2009.
- 795 Shen, R., Zhang, J.L., He, B., Li, F., Zhang, Z.M., Zhou, R., Ou, X.K.: The structure characteristic



- and analysis on similarity of grassland community in dry-hot valley of Yuanjiang, *Ecol. Environ. Sci.*, 19, 2821–2825, <https://doi.org/10.16258/j.cnki.1674-5906.2010.12.011>, 2010.
- Sulman, B.N., Roman, D.T., Yi, K., Wang, L.X., Phillips, R.P., Novick, K.A.: High atmospheric demand for water can limit forest carbon uptake and transpiration as severely as dry soil, *Geophys. Res. Lett.*, 43, 9686–95, <https://doi.org/10.1002/2016GL069416>, 2016.
- Sun, S.S., Wu, Z.P., Xiao, Q.T., Yu, F., Gu, S.H., Fang, D., Li, L., Zhao, X.B.: Factors influencing CO<sub>2</sub> fluxes of a grassland ecosystem on the Yunnan-Guizhou Plateau, China, *Acta Prataculturae Sin.*, 29, 184–191, <https://doi.org/10.7522/10.11686/cyxb2019410>, 2020.
- Sha, Z.Y., Bai, Y.F., Li, R.R., Lan, H., Zhang, X.L., Li, J., Liu, X.F., Chang, S.J., Xie, Y.C.: The global carbon sink potential of terrestrial vegetation can be increased substantially by optimal land management, *Commun. Earth Environ.*, 3, 8, <https://doi.org/10.1038/s43247-021-00333-1>, 2022.
- Tagesson, T., Fensholt, R., Cropley, F., Guirio, I., Horion, S., Ehammer, A., Ardo, J.: Dynamics in carbon exchange fluxes for a grazed semi-arid savanna ecosystem in West Africa, *Agric. Ecosyst. Environ.*, 205, 15–24, <https://doi.org/10.1016/j.agee.2015.02.017>, 2015.
- Tarin, T., Nolan, R.H., Eamus, D., Cleverly, J.: Carbon and water fluxes in two adjacent Australian semi-arid ecosystems, *Agric. For. Meteorol.*, 281, 107853, <https://doi.org/10.1016/j.agrformet.2019.107853>, 2020.
- Veenendaal, E.M., Kolle, O., Lloyd, J.: Seasonal variation in energy fluxes and carbon dioxide exchange for a broad-leaved semiarid savanna (Mopane woodland) in Southern Africa, *Global Change Biol.*, 10, 318–328, <https://doi.org/10.1111/j.1365-2486.2003.00699.x>, 2004.
- Woodwell, G.M., Hobbie, J.E., Houghton, R.A., Melillo, J.M., Moorer, B., Peterson, B.J., Shaver, G.R.: Global deforestation: contribution to atmospheric carbon dioxide, *Science*, 222, 1081–1086, <https://doi.org/10.1126/science.222.4628.1081>, 1983.
- White, R.P., Murray, S., Rohweder, M.: Pilot analysis of global ecosystems: grassland ecosystems, World Resources Institute, Washington, DC, <http://www.wri.org/wr2000>, 2000.
- Weltzin, J.F., Loik, M.E., Schwinning, S., Williams, D.G., Fay, P.A., Haddad, B.M., Harte, J., Huxman, T.E., Knapp, A.K., Lin, G.H., Pockman, W.T., Shaw, R.M., Small, E.E., Smith, M.D., Smith, S.D., Tissue, D.T., Zak, J.C.: Assessing the response of terrestrial ecosystems to potential changes in precipitation, *BioScience*, 53, 941–952, [https://doi.org/10.1641/0006-3568\(2003\)053\[0941:ATROTE\]2.0.CO;2](https://doi.org/10.1641/0006-3568(2003)053[0941:ATROTE]2.0.CO;2), 2003.
- Wen, X.F., Sun, X.M., Liu, Y.F., Li, X.B.: Effect of linear and exponential fitting on the initial rate of change in CO<sub>2</sub> concentration across the soil surface, *Chin. J. Plant Ecol.*, 31, 380–385, <https://doi.org/10.17521/cjpe.2007.0046>, 2007.
- Williams, A.P., Allen, C.D., Macalady, A.K., Griffin, D., Woodhouse, C.A., Meko, D.M., Swetnam, T.W., Rauscher, S.A., Seager, R., Grissino-Mayer, H.D., Dean, J.S., Cook, E.R., Gangodagamage, C., Cai, M., McDowell, N.G.: Temperature as a potent driver of regional forest drought stress and tree mortality, *Nat. Clim. Change*, 3, 292–297, <https://doi.org/10.1038/nclimate1693>, 2013.
- Wang, W.Y., Guo, J.X., Wang, Y.S., Wu, K.: Observing characteristics of CO<sub>2</sub> flux and its influencing factors over Xilinhot grassland, *J. Meteorol. Sci.*, 35, 100–107, <https://doi.org/10.3969/2013jms.0065>, 2015.
- Wu, F.T., Cao, S.K., Cao, G.C., Han, G.Z., Lin, Y.Y., Cheng, S.Y.: Variation of CO<sub>2</sub> flux of alpine wetland ecosystem of *Kobresia tibetica* wet meadow in Lake Qinghai, *J. Ecol. Rural Environ.*,





- 840 34, 124–131, <https://doi.org/10.11934/1.19n.1673-4831.2018.02.004>, 2018.
- 841 Wang, N., Quesada, B., Xia, L.L., Butterbach-Bahl, K., Goodale, C.L., Kiese, R.: Effects of climate
- 842 warming on carbon fluxes in grasslands – a global meta-analysis, *Global Change Biol*, 25, 1839–
- 843 1851, <https://doi.org/10.1111/gcb.14603>, 2019.
- 844 Wang, Y.Y., Xiao, J.F., Ma, Y.M., Luo, Y.Q., Hu, Z.Y., Li, F., Li Y.N., Gu, L.L., Li, Z.G., Yuan, L.:
- 845 Carbon fluxes and environmental controls across different alpine grassland types on the Tibetan
- 846 Plateau, *Agric. For. Meteorol*, 311, 1–14, <https://doi.org/10.1016/j.agrformet.2021.108694>,
- 847 2021.
- 848 Wang, H.H., Huang, W.D., He, Y.Z., Zhu, Y.Z.: Effects of warming and precipitation reduction on
- 849 soil respiration in Horqin sandy grassland, northern China, *Catena*, 233, 107470,
- 850 <https://doi.org/10.1016/j.catena.2023.107470>, 2023.
- 851 Wang, F., Harindintwali, J.D., Wei, K., Shan, Y.L., Mi, Z.F., Costello, M.J., Grunwald, S., Feng,
- 852 Z.Z., Wang, F.M., Guo, Y.M., Wu, X., Kumar, P., Kästner, M., Feng, X.J., Kang, S.C., Liu, Z., Fu,
- 853 Y.H., Zhao, W., Ouyang, C.J., Shen, J.L., Wang, H.J., Chang, S.X., Evans, D.L., Wang, R., Zhu,
- 854 C.W., Xiang, L.L., Rinklebe, J., Du, M.M., Huang, L., Bai, Z.H., Li, S., Lal, R., Elsner, M.,
- 855 Wigneron, J.P., Florindo, F., Jiang, X., Shaheen, S.M., Zhong, X.Y., Bol, R., Vasques, G.M., Li,
- 856 X.F., Pfausch, S., Wang, M.G., He, X., Agathokleous, E., Du, H.B., Kengara, F.O., Brahushi, F.,
- 857 Long, X.E., Pereira, P., Ok, Y.S., Rillig, M.C., Jeppesen, E., Barceló, D., Yan, X.Y., Jiao, N.Z.,
- 858 Han, B.X., Schäffer, A., Chen, J.M., Zhu, Y.G., Cheng, H., Amelung, W., Spötl, C., Zhu, J.K.,
- 859 Tiedje, J.M.: Climate change: Strategies for mitigation and adaptation, *The Innovation Geosci*, 1,
- 860 100015, <https://doi.org/10.59717/j.xinn-geo.2023.100015>, 2023.
- 861 Xu, X.L.: China watershed and river network datasets based on DEM extraction, *Resource and*
- 862 *Environmental Science Data Registration and Publishing System* [data set],
- 863 <https://doi.org/10.12078/2018060101>, 2018.
- 864 Xu, X.L.: China's multi-year provincial administrative division boundary data, *Resource and*
- 865 *Environmental Science Data Registration and Publishing System* [data set],
- 866 <https://doi.org/10.12078/2023010103>, 2023a.
- 867 Xu, X.L.: China's multi-year county administrative division boundary data, *Resource and*
- 868 *Environmental Science Data Registration and Publishing System* [data set],
- 869 <https://doi.org/10.12078/2023010101>, 2023b.
- 870 Xu, Y.N., Wang, X., Sun, Y.R., Liu, H.T., Li, L., Schäufele, R., Gong, X.Y.: Response of
- 871 photosynthetic <sup>13</sup>C discrimination to vapour pressure deficit reflects changes in bundle-sheath
- 872 leakiness in two C<sub>4</sub> grasses, *Environ. Exp. Bot*, 216, 105529,
- 873 <https://doi.org/10.1016/j.envexpbot.2023.105529>, 2023.
- 874 Yu, K., D'Odorico, P.: Hydraulic lift as a determinant of tree–grass coexistence on savannas, *New*
- 875 *Phytol*, 207, 1038–1051, <https://doi.org/10.1111/nph.13431>, 2015.
- 876 Yuan, W.P., Zheng, Y., Piao, S.L., Ciais, P., Lombardozzi, D., Wang, Y.P., Ryu, Y., Chen, G.X., Dong,
- 877 W.J., Hu, Z.M., Jain, A.K., Jiang, C.Y., Kato, E., Li, S.H., Lienert, S., Liu, S.G., Nabel, J.E.M.S.,
- 878 Qin, Z.C., Quine, T., Sitch, S., Smith, W.K., Wang, F., Wu, C.Y., Xiao, Z.Q., Yang, S.: Increased
- 879 atmospheric vapor pressure deficit reduces global vegetation growth, *Sci. Adv*, 5, eaax1396,
- 880 <https://doi.org/10.1126/sciadv.aax1396>, 2019.
- 881 Yang, K.Y., Gong, H.D., Li, J., Liu, Y.T., Sha, L.Q., Song, Q.H., Jin, Y.Q., Yang, D.X., Li, P.G., Wen,
- 882 G.J., Chen, A.G., Pang, Z.Q., Zhang, Y.P.: Dynamic characteristics of soil respiration of savanna
- 883 ecosystem in dry hot valley of Yuanjiang, *J. Zhejiang Agric. For. Univ*, 37, 849–859,





- 884 <https://doi.org/10.11833/j.issn.2095-0756.20190647>, 2020.
- 885 Yang, Y.H., Shi, Y., Sun, W.J., Chang, J.F., Zhu, J.X., Chen, L.Y., Wang, X., Guo, Y.P., Hongtu, Z.,  
886 Yu, L.F., Zhao, S.Q., Xu, K., Zhu, J.L., Shen, H.H., Wang, Y.Y., Peng, Y.F., Zhao, X., Wang, X.Q.,  
887 Hu, H.F., Chen, S.Q., Huang, M., Wen, X.F., Wang, S.P., Zhu, B., Niu, S.L., Tang, Z.Y., Liu, L.L.,  
888 Fang, J.Y.: Terrestrial carbon sinks in China and around the world and their contribution to carbon  
889 neutrality, *Sci. China Life Sci.*, 65, 861–895, <https://doi.org/10.1007/s11427-021-2045-5>, 2022.
- 890 Zhang, R.Z.: The dry valley of the Hengduan Mountains region, Beijing Sci. Press, ISBN  
891 703002916X, 1992.
- 892 Zhao, L., Gu, S., Xu, S.X., Zhao, X.Q., Li, Y.N.: Carbon flux and controlling process of alpine  
893 meadow on Qinghai-Tibetan plateau, *Acta Botan. Boreali-Occidentalia Sin.*, 27, 1054–1060,  
894 2007.
- 895 Zhang F.W., Li, Y.N., Cao, G.M., Li, F.X., Ye, G.J., Liu, J.H., Wei, Y.L., Zhao, X.Q.: CO<sub>2</sub> fluxes and  
896 their driving factors over alpine meadow grassland ecosystems in the northern shore of Qinghai  
897 Lake, China, *Chin. J. Plant Ecol.*, 36, 187–198, <https://doi.org/10.3724/SP.J.1258.2012.00187>,  
898 2012.
- 899 Zou, H., Gao, G.Y., Fu, B.J.: The relationship between grassland ecosystem and soil water in arid  
900 and semi-arid areas: a review, *Acta Ecol. Sin.*, 36, 3127–3136,  
901 <https://doi.org/10.5846/stxb201506211251>, 2016.
- 902 Zhang, W.M., Brandt, M., Penuelas, J., Guichard, F., Tong, X., Tian, F., Fensholt, R.: Ecosystem  
903 structural changes controlled by altered rainfall climatology in tropical savannas, *Nat.*  
904 *Commun.*, 10, 671, <https://doi.org/10.1038/s41467-019-08602-6>, 2019.
- 905 Zhang, R., Zhao, X.Y., Zuo, X.A., Qu, H., Degen, A.A., Luo, Y.Y., Ma, X.J., Chen, M., Liu, L.X.,  
906 Chen, J.L.: Impacts of precipitation on ecosystem carbon fluxes in desert-grasslands in Inner  
907 Mongolia, China, *J. Geophys. Res. Atmos.*, 124, 1266–1276,  
908 <https://doi.org/10.1029/2018JD028419>, 2019.
- 909 Zhao, H.C., Jia, G.S., Wang, H.S., Zhang, A.Z., Xu, X.Y.: Diurnal variations of the carbon fluxes of  
910 semiarid meadow steppe and typical steppe in China, *Clim. Environ. Res.*, 25, 172–184,  
911 <https://doi.org/10.3878/j.issn.1006-9585.2019.19096>, 2020.
- 912 Zhang, Y.J., Qiu, L.P., Gao, H.L., Liu, J., Wei, X.R., Zhang, X.C.: Responses of ecosystem CO<sub>2</sub>  
913 exchange to clipping in a semi-arid typical grassland on the Loess Plateau, *Acta Ecol. Sin.*, 40,  
914 336–344, <https://doi.org/10.5846/stxb201810172244>, 2020.
- 915 Zeng, Z.Q., Wu, W.X., Li, Y.M., Huang, C., Zhang, X.Q., Peñuelas, J., Zhang, Y., Gentile, P., Li,  
916 Z.L., Wang, X.Y., Huang, H., Ren, X.S., Ge, Q.S.: Increasing meteorological drought under  
917 climate change reduces terrestrial ecosystem productivity and carbon storage, *One Earth*, 6,  
918 1326–1339, <https://doi.org/10.1016/j.oneear.2023.09.007>, 2023.
- 919 Zhou, Y., Bomfim, B., Bond, W.J., Boutton, T.W., Case, M.F., Coetsee, C., Davies, A.B., February,  
920 E.C., Gray, E.F., Silva, L.C.R., Wrigh, J., Staver, A.C.: Soil carbon in tropical savannas mostly  
921 derived from grasses, *Nat. Geosci.*, 16, 710–716, [https://www.nature.com/articles/s41561-023-](https://www.nature.com/articles/s41561-023-01232-0)  
922 [01232-0](https://www.nature.com/articles/s41561-023-01232-0), 2023.
- 923 Zhong, Z.Q., He, B., Wang, Y.P., Chen, H.W., Chen, D.L., Fu, Y.S.H., Chen, Y.N., Guo, L.L., Deng,  
924 Y., Huang, L., Yuan, W.P., Hao, X.M., Tang, R., Liu, H.M., Sun, L.Y., Xie, X.M., Zhang, Y.F.:  
925 Disentangling the effects of vapor pressure deficit on northern terrestrial vegetation productivity,  
926 *Sci. Adv.*, 9, eadf3166, <https://doi.org/10.1126/sciadv.adf3166>, 2023.
